# Supplementary material
Source: ML conference proceedings conference paper supplement (https://openreview.net/forum?id=XxP75wV6JGH)
Supplement: supplementary_material [file attachment]

---

# FERMI: Fair Empirical Risk Minimization Via Exponential Rényi Mutual Information

---

Anonymous Author(s)

Affiliation

Address

email

## Abstract

1 Despite the success of large-scale empirical risk minimization (ERM) at achieving  
2 high accuracy across a variety of machine learning tasks, fair ERM is hindered by  
3 the incompatibility of fairness constraints with stochastic optimization. In this pa-  
4 per, we propose the fair empirical risk minimization via exponential Rényi mutual  
5 information (FERMI) framework. FERMI is built on a stochastic estimator for ex-  
6 ponential Rényi mutual information (ERMI), an information divergence measuring  
7 the degree of the dependence of predictions on sensitive attributes. Theoretically,  
8 we show that ERMI upper bounds existing popular fairness violation metrics, thus  
9 controlling ERMI provides guarantees on other commonly used violations, such as  
10  $L_\infty$ . We derive an unbiased estimator for ERMI, which we use to derive the FERMI  
11 algorithm. We prove that FERMI converges for demographic parity, equalized  
12 odds, and equal opportunity notions of fairness in stochastic optimization. Em-  
13 pirically, we show that FERMI is amenable to large-scale problems with multiple  
14 (non-binary) sensitive attributes and non-binary targets. Extensive experiments  
15 show that FERMI achieves the most favorable tradeoffs between fairness violation  
16 and test accuracy across all tested setups compared with state-of-the-art baselines  
17 for demographic parity, equalized odds, equal opportunity. These benefits are  
18 especially significant for non-binary classification with large sensitive sets and  
19 small batch sizes, showcasing the effectiveness of the FERMI objective and the  
20 developed stochastic algorithm for solving it.

## 21 1 Introduction

22 Ensuring that decisions made using machine learning algorithms are fair to different subgroups is  
23 of utmost importance. Without any mitigation strategy, machine learning algorithms may result in  
24 discrimination against certain subgroups based on sensitive attributes, such as gender or race, even if  
25 such discrimination is absent in the training data (Datta et al., 2015; Sweeney, 2013; Bolukbasi et al.,  
26 2016; Angwin et al., 2016; Calmon et al., 2017b; Feldman et al., 2015; Hardt et al., 2016; Fish et al.,  
27 2016; Woodworth et al., 2017; Zafar et al., 2017; Bechavod & Ligett, 2017; Kearns et al., 2018).  
28 Algorithmic fairness literature aims to remedy such discrimination issues.

29 A machine learning algorithm satisfies the *demographic parity* fairness notion, if the predicted target  
30 is independent of the sensitive attributes (Dwork et al., 2012). Promoting demographic parity can  
31 lead to poor performance, especially if the true outcome is not independent of the sensitive attributes.  
32 To remedy this, Hardt et al. (2016) proposed *equalized odds* to ensure that the predicted target is  
33 conditionally independent of the sensitive attributes given the true label. A further relaxed version of  
34 this notion is *equal opportunity* which is satisfied if predicted target is conditionally independent of  
35 sensitive attributes given that the true label is in an advantaged class (Hardt et al., 2016). The inherent  
36 assumption in such conditional notions is that the true labels are fair. These notions suffer from a  
37 potential amplification of the inherent discrimination that may exist in the training data. Tackling  
38 such bias is beyond the scope of this work; cf. Kilbertus et al. (2020) and Bechavod et al. (2019).

| Reference                 | NB target | NB attrib. | NB code | Fairness notion |     |     | Beyond logistic | Stoch. alg. (unbiased**) | Converg. (stoch.) |
|---------------------------|-----------|------------|---------|-----------------|-----|-----|-----------------|--------------------------|-------------------|
|                           |           |            |         | dp              | eod | eop |                 |                          |                   |
| <b>FERMI (this work)</b>  | ✓         | ✓          | ✓       | ✓               | ✓   | ✓   | ✓               | ✓ (✓)                    | ✓ (✓)             |
| (Cho et al., 2020b)       | ✓         | ✓          | ✓       | ✓               | ✓   | ✗   | ✓               | ✓ (✗)                    | ✗                 |
| (Cho et al., 2020a)       | ✓         | ✓          | ✗       | ✓               | ✓   | ✗   | ✓               | ✓ (✓)                    | ✗                 |
| (Baharlouei et al., 2020) | ✓         | ✓          | ✓       | ✓               | ✓   | ✓   | ✓               | ✗                        | ✓ (✗)             |
| (Rezaei et al., 2020)     | ✗         | ✗          | ✗       | ✓               | ✓   | ✗   | ✗               | ✗                        | ✗                 |
| (Jiang et al., 2020)*     | ✗         | ✓          | ✗       | ✓               | ✗   | ✗   | ✗               | ✗                        | ✗                 |
| (Mary et al., 2019)       | ✓         | ✓          | ✓       | ✓               | ✓   | ✗   | ✓               | ✓ (✗)                    | ✗                 |
| (Donini et al., 2018)     | ✗         | ✓          | ✗       | ✗               | ✓   | ✗   | ✓               | ✗                        | ✗                 |
| (Zhang et al., 2018)      | ✓         | ✓          | ✗       | ✓               | ✓   | ✗   | ✓               | ✓ (✗)                    | ✗                 |

Table 1: Comparison of state-of-the-art in-processing methods. **NB = non-binary**, dp = demographic parity, eod = equalized odds, eop = equal opportunity. While satisfying eod guarantees satisfying eop, an eod algorithm does not necessarily achieve a favorable tradeoff between performance and fairness violation in eop; we only credit those works that provide/implement algorithms for a given fairness notion. FERMI is the only method compatible with stochastic optimization and guaranteed convergence. The only existing baselines for non-binary classification with non-binary sensitive attributes are (Mary et al., 2019; Baharlouei et al., 2020; Cho et al., 2020b) (NB code). \*We refer to the in-processing method of (Jiang et al., 2020), not their post-processing method. \*\*We use the term “unbiased” to refer to unbiased estimation in statistical sense; it is not to be confused with bias in the fairness sense, for which we use the term discrimination.

39 **Measuring fairness violation.** In practice, the learner only has access to finite samples and cannot  
40 verify demographic parity, equalized odds, or equal opportunity. This has led the machine learning  
41 community to define several fairness violation metrics that quantify the degree of (conditional)  
42 independence between random variables, e.g.,  $L_\infty$  distance (Dwork et al., 2012; Hardt et al., 2016),  
43 mutual information (Kamishima et al., 2011; Rezaei et al., 2020; Steinberg et al., 2020; Zhang  
44 et al., 2018; Cho et al., 2020a), Pearson correlation (Zafar et al., 2017), false positive/negative rates  
45 (Bechavod & Ligett, 2017), Hilbert Schmidt independence criterion (HSIC) (Pérez-Suay et al., 2017),  
46 Rényi correlation (Mary et al., 2019; Baharlouei et al., 2020; Grari et al., 2019, 2020), and exponential  
47 Rényi mutual information (ERMI) (Mary et al., 2019). In this paper, we focus on three variants of  
48 ERMI specialized to demographic parity, equalized odds, and equal opportunity. We prove that ERMI  
49 provides an upper bound on the rest of the above existing notions of fairness violation. Consequently,  
50 a model trained to reduce ERMI will also provide guarantees on these other fairness violations.  
51 We also develop a stochastic estimator for ERMI that is compatible with large-scale stochastic  
52 optimization, and use it as a regularizer in within ERM, and call it FERMI. We theoretically show  
53 that FERMI is convergent, and empirically demonstrate that it outperforms all other state-of-the-art  
54 baselines, including (Mary et al., 2019) which solves the same objective as FERMI.

55 **Related work & contributions.** Fairness-promoting machine learning algorithms can be categorized  
56 in three main classes: *pre-processing*, *post-processing*, and *in-processing* methods. Pre-processing  
57 algorithms (Feldman et al., 2015; Zemel et al., 2013; Calmon et al., 2017b) transform the biased  
58 data features to a new space in which the labels and sensitive attributes are statistically independent.  
59 This transform is oblivious to the training procedure. Post-processing approaches (Hardt et al., 2016;  
60 Pleiss et al., 2017) mitigate the discrimination of the classifier by altering the the final decision.  
61 In-processing approaches focus on the training procedure and impose the notions of fairness as  
62 constraints or regularization terms in the training procedure. Several regularization-based methods  
63 are proposed in the literature to promote fairness in decision-trees (Kamiran et al., 2010; Raff et al.,  
64 2018; Aghaei et al., 2019), support vector machines (Donini et al., 2018), neural networks (Grari  
65 et al., 2020; Cho et al., 2020b), or (logistic) regression models (Zafar et al., 2017; Berk et al., 2017;  
66 Taskesen et al., 2020; Chzhen & Schreuder, 2020; Baharlouei et al., 2020; Jiang et al., 2020; Grari  
67 et al., 2019). While in-processing approaches generally give rise to better tradeoffs between fairness  
68 violation and performance, existing approaches are mostly incompatible with large-scale stochastic  
69 optimization. This paper addresses this problem. See below for a summary of our contributions and  
70 Table 1 for a summary of the main differences between FERMI and existing in-processing methods.

- 71 1. We analyze a notion of fairness violation called ERMI. We show that ERMI is a stronger notion of  
72 fairness violation than all existing notions. Therefore, a model that ensures small ERMI violation  
73 is guaranteed to have small fairness violation with respect to all other notions as well.
- 74 2. We formulate an empirical objective, called FERMI objective, for using ERMI as a regularizer  
75 with empirical risk minimization. We propose a solver for FERMI, which is the first stochastic  
76 in-processing fairness algorithm with guaranteed convergence. The existing stochastic fairness

77 algorithms by Zhang et al. (2018); Mary et al. (2019); Cho et al. (2020a,b) are not guaranteed to  
 78 converge.

79 3. We demonstrate through extensive numerical experiments that FERMI achieves superior fair-  
 80 ness-accuracy tradeoff curves against all comparable baselines, even when fairness violation is  
 81 measured in terms of commonly used  $L_\infty$  (for demographic parity, equalized odds, and equal  
 82 opportunity). In particular, the performance gap is very large when minibatch size is small (as is  
 83 practically necessary for large-scale problems), and the number of sensitive attributes is large.

## 84 2 Fairness notions: demographic parity, equalized odds, equal opportunity

85 In this section, we state a notion of fairness that generalizes demographic parity, equalized odds,  
 86 and equal opportunity fairness definitions (the three notions considered in this paper). This will be  
 87 convenient for presenting our theoretical results. Consider a learner who trains a model to make  
 88 a prediction,  $\hat{Y}$ , e.g., whether or not to extend a loan, supported on  $\mathcal{Y}$  which can be discrete or  
 89 continuous. The prediction is made using a set of features,  $\mathbf{X}$ , e.g., financial history features. We  
 90 assume that there is a set of discrete sensitive attributes,  $S$ , e.g., race and sex, supported on  $\mathcal{S}$ ,  
 91 associated with each sample. Further, let  $\mathcal{A} \subseteq \mathcal{Y}$  denote an advantaged outcome class, e.g., the  
 92 outcome where a loan is extended.

93 **Definition 1** ( $(Z, \mathcal{Z})$ -fairness). *Given a random variable  $Z$ , let  $\mathcal{Z}$  be a subset of values that  $Z$  can  
 94 take. We say that a learning machine satisfies  $(Z, \mathcal{Z})$ -fairness if for every  $z \in \mathcal{Z}$ ,  $\hat{Y}$  is conditionally  
 95 independent of  $S$  given  $Z = z$ , i.e.  $\forall \hat{y} \in \mathcal{Y}, s \in \mathcal{S}, z \in \mathcal{Z}, p_{\hat{Y}, S|Z}(\hat{y}, s|z) = p_{\hat{Y}|Z}(\hat{y}|z)p_{S|Z}(s|z)$ .*

96  $(Z, \mathcal{Z})$ -fairness includes the popular demographic parity, equalized odds, and equal opportunity  
 97 notions of fairness as special cases:

- 98 1.  $(Z, \mathcal{Z})$ -fairness recovers demographic parity (Dwork et al., 2012) if  $Z = 0$  and  $\mathcal{Z} = \{0\}$ . In this  
 99 case, conditioning on  $Z$  has no effect, and hence  $(0, \{0\})$  fairness is equivalent to the independence  
 100 between  $\hat{Y}$  and  $S$  (see Definition 6, Appendix A).
- 101 2.  $(Z, \mathcal{Z})$ -fairness recovers equalized odds (Hardt et al., 2016) if  $Z = Y$  and  $\mathcal{Z} = \mathcal{Y}$ . In this case,  
 102  $Z \in \mathcal{Z}$  is trivially satisfied. Hence, conditioning on  $Z$  is equivalent to conditioning on  $Y$ , which  
 103 recovers the equalized odds notion of fairness, i.e., conditional independence of  $\hat{Y}$  and  $S$  given  $Y$   
 104 (see Definition 7, Appendix A).
- 105 3.  $(Z, \mathcal{Z})$ -fairness recovers equal opportunity (Hardt et al., 2016) if  $Z = Y$  and  $\mathcal{Z} = \mathcal{A}$ . This is also  
 106 similar to the previous case with  $\mathcal{Y}$  replaced with  $\mathcal{A}$  (see Definition 8, Appendix A).

107 Note that verifying  $(Z, \mathcal{Z})$ -fairness requires having access to the joint distribution of random variables  
 108  $(Z, \hat{Y}, S)$ . This joint distribution is unavailable to the learner in the context of machine learning, and  
 109 hence the learner would resort to empirical estimation of the amount of violation of independence,  
 110 measured through some divergence. See (Williamson & Menon, 2019) for a related discussion.

## 111 3 Measuring fairness violation using exponential Rényi mutual information

112 Most existing fairness violations can be viewed as a (conditional)  $f$ -divergence between the joint  
 113 distribution of sensitive attributes and predicted targets,  $p_{\hat{Y}, S|Z}$ , and the Kronecker product of the  
 114 marginals,  $p_{\hat{Y}|Z} \otimes p_{S|Z}$ . In this section, we focus on ERMI and show that several existing fairness  
 115 violations are upper bounded by ERMI. For brevity, we present all definitions and results  $(Z, \mathcal{Z})$ .

116 **Definition 2** (ERMI – exponential Rényi mutual information). *We define the exponential Rényi  
 117 mutual information between  $\hat{Y}$  and  $S$  given  $Z \in \mathcal{Z}$  as*

$$D_R(\hat{Y}; S|Z \in \mathcal{Z}) := \mathbb{E}_{Z, \hat{Y}, S} \left\{ \frac{p_{\hat{Y}, S|Z}(\hat{Y}, S|Z)}{p_{\hat{Y}|Z}(\hat{Y}|Z)p_{S|Z}(S|Z)} \middle| Z \in \mathcal{Z} \right\} - 1. \quad (\text{ERMI})$$

118 In Appendix B, we unravel the definition for the special cases of interest corresponding to demo-  
 119 graphic parity, equalized odds, and equal opportunity. We also discuss that ERMI is the  $\chi^2$ -divergence  
 120 (which is an  $f$ -divergence) between the joint distribution,  $p_{\hat{Y}, S|Z}$ , and the Kronecker product of  
 121 marginals,  $p_{\hat{Y}|Z} \otimes p_{S|Z}$  (Calmon et al., 2017a). In particular, ERMI is non-negative, and zero if  
 122 and only if  $(Z, \mathcal{Z})$ -fairness is satisfied. In the context of algorithmic fairness, ERMI was first used  
 123 by Mary et al. (2019) as a regularizer. We will provide a new stochastic solver/estimator for ERMI,  
 124 which theoretically converges and empirically outperforms the one by Mary et al. (2019).

125 **Definition 3** (Rényi mutual information (Rényi, 1961)). *Let the Rényi mutual information of order*  
 126  $\alpha > 1$  *between random variables*  $\hat{Y}$  *and*  $S$  *given*  $Z \in \mathcal{Z}$  *be defined as:*

$$I_\alpha(\hat{Y}; S|Z \in \mathcal{Z}) := \frac{1}{\alpha - 1} \log \left( \mathbb{E}_{Z, \hat{Y}, S} \left\{ \left( \frac{p_{\hat{Y}, S|Z}(\hat{Y}, S|Z)}{p_{\hat{Y}|Z}(\hat{Y}|Z)p_{S|Z}(S|Z)} \right)^{\alpha-1} \middle| Z \in \mathcal{Z} \right\} \right), \quad (\text{RMI})$$

127 *which generalizes Shannon mutual information*

$$I_1(\hat{Y}; S|Z \in \mathcal{Z}) := \mathbb{E}_{Z, \hat{Y}, S} \left\{ \log \left( \frac{p_{\hat{Y}, S|Z}(\hat{Y}, S|Z)}{p_{\hat{Y}|Z}(\hat{Y}|Z)p_{S|Z}(S|Z)} \right) \middle| Z \in \mathcal{Z} \right\}, \quad (\text{MI})$$

128 *and recovers it as*  $\lim_{\alpha \rightarrow 1^+} I_\alpha(\hat{Y}; S|Z \in \mathcal{Z}) = I_1(\hat{Y}; S|Z \in \mathcal{Z})$ .

129 Note that  $I_\alpha(\hat{Y}; S|Z \in \mathcal{Z}) \geq 0$  with equality if and only if  $(Z, \mathcal{Z})$ -fairness is satisfied.

130 **Theorem 1** (ERMI is stronger than Shannon mutual information). *We have*

$$0 \leq I_1(\hat{Y}; S|Z \in \mathcal{Z}) \leq I_2(\hat{Y}; S|Z \in \mathcal{Z}) \leq e^{I_2(\hat{Y}; S|Z \in \mathcal{Z})} - 1 = D_R(\hat{Y}; S|Z \in \mathcal{Z}). \quad (1)$$

131 All proofs are relegated to the appendix. Theorem 1 establishes that ERMI is a stronger measure of  
 132 fairness violation in the sense that driving it to zero would also bound the Shannon mutual information,  
 133 which is used for promoting fairness in recent literature (Cho et al., 2020a). It also shows that ERMI  
 134 is exponentially related to the Rényi mutual information of order 2.  
 135

136 **Definition 4** (Rényi correlation (Hirschfeld, 1935; Gebelein, 1941; Rényi, 1959)). *Let*  $\mathcal{F}$  *and*  $\mathcal{G}$   
 137 *be the set of measurable functions such that for random variables*  $\hat{Y}$  *and*  $S$ ,  $\mathbb{E}_{\hat{Y}}\{f(\hat{Y}; z)\} =$   
 138  $\mathbb{E}_S\{g(S; z)\} = 0$ ,  $\mathbb{E}_{\hat{Y}}\{f(\hat{Y}; z)^2\} = \mathbb{E}_S\{g(S; z)^2\} = 1$ , *for all*  $z \in \mathcal{Z}$ . *Rényi correlation is:*

$$\rho_R(\hat{Y}, S|Z \in \mathcal{Z}) := \sup_{f, g \in \mathcal{F} \times \mathcal{G}} \mathbb{E}_{Z, \hat{Y}, S} \left\{ f(\hat{Y}; Z)g(S; Z) \middle| Z \in \mathcal{Z} \right\}. \quad (\text{RC})$$

139

140 Rényi correlation generalizes Pearson correlation,

$$\rho(\hat{Y}, S|Z \in \mathcal{Z}) := \mathbb{E}_Z \left\{ \frac{\mathbb{E}_{\hat{Y}, S}\{\hat{Y}S|Z\}}{\sqrt{\mathbb{E}_{\hat{Y}}\{\hat{Y}^2|Z\}\mathbb{E}_S\{S^2|Z\}}} \middle| Z \in \mathcal{Z} \right\}, \quad (\text{PC})$$

141

142 to capture nonlinear dependencies between the random variables by finding functions of random  
 143 variables that maximize the Pearson correlation coefficient between the random variables. In fact,  
 144 it is true that  $\rho_R(\hat{Y}, S|Z \in \mathcal{Z}) \geq 0$  with equality if and only if  $(Z, \mathcal{Z})$ -fairness is satisfied. Rényi  
 145 correlation has gained popularity as a measure of fairness violation (Mary et al., 2019; Baharlouei  
 146 et al., 2020; Grari et al., 2020). Rényi correlation is also upper bounded by ERMI. The following  
 147 result has already been shown by Mary et al. (2019) and we present it for completeness.

148 **Theorem 2** (ERMI is stronger than Rényi correlation). *We have*

$$0 \leq |\rho(\hat{Y}, S|Z \in \mathcal{Z})| \leq \rho_R(\hat{Y}, S|Z \in \mathcal{Z}) \leq D_R(\hat{Y}; S|Z \in \mathcal{Z}), \quad (2)$$

149 *and if*  $|\mathcal{S}| = 2$ ,  $D_R(\hat{Y}; S|Z \in \mathcal{Z}) = \rho_R(\hat{Y}, S|Z \in \mathcal{Z})$ .

150 **Definition 5** ( $L_q$  fairness violation). *We define the*  $L_q$  *fairness violation for*  $q \geq 1$  *by:*

$$L_q(\hat{Y}, S|Z \in \mathcal{Z}) := \mathbb{E}_Z \left\{ \left( \int_{\hat{y} \in \mathcal{Y}_0} \sum_{s \in \mathcal{S}_0} |p_{\hat{Y}, S|Z}(\hat{y}, s|Z) - p_{\hat{Y}|Z}(\hat{y}|Z)p_{S|Z}(s|Z)|^q dy \right)^{\frac{1}{q}} \middle| Z \in \mathcal{Z} \right\}. \quad (\text{Lq})$$

151 Note that  $L_q(\hat{Y}, S|Z \in \mathcal{Z}) = 0$  if and only if  $(Z, \mathcal{Z})$ -fairness is satisfied. In particular,  $L_\infty$  fairness  
 152 violation recovers demographic parity violation (Kearns et al., 2018, Definition 2.1) if we let  $\mathcal{Z} = \{0\}$   
 153 and  $Z = 0$ . It also recovers equal opportunity violation (Hardt et al., 2016) if  $\mathcal{Z} = \mathcal{A}$  and  $Z = Y$ .

154 **Theorem 3** (ERMI is stronger than  $L_\infty$  fairness violation). *Let*  $\hat{Y}$  *be a discrete or continuous random*  
 155 *variable, and*  $S$  *be a discrete random variable supported on a finite set. Then for any*  $q \geq 1$ ,

$$0 \leq L_q(\hat{Y}, S|Z \in \mathcal{Z}) \leq \sqrt{D_R(\hat{Y}, S|Z \in \mathcal{Z})}. \quad (3)$$

156

157 The above theorem says that if a method controls ERMI value for imposing fairness, then  $L_\infty$   
 158 violation is controlled. In particular, the variant of ERMI that is specialized to demographic parity  
 159 also controls  $L_\infty$  demographic parity violation (Kearns et al., 2018). The variant of ERMI that is  
 160 specialized to equal opportunity also controls the  $L_\infty$  equal opportunity violation (Hardt et al., 2016).  
 161 While our algorithm uses ERMI as a regularizer, in our experiments, we measure fairness violation  
 162 through the more commonly used  $L_\infty$  violation. Despite this, we show that our approach leads to  
 163 better tradeoff curves between fairness violation and performance.

164 **Remark.** The bounds in Theorems 1-3 are not tight in general, but this is not of practical concern.  
 165 They show that bounding ERMI is sufficient because any model that achieves small ERMI is  
 166 guaranteed to satisfy any other fairness violation. This makes ERMI an effective regularizer for  
 167 promoting fairness. In fact, in Sec. 5, we see that the proposed algorithm, FERMI, achieves the best  
 168 tradeoffs between fairness violation and performance across state-of-the-art baselines.

#### 169 4 FERMI: fair empirical risk minimization through ERMI regularization

170 Our goal is to train a model that balances fairness and accuracy objectives. To this end, we introduce  
 171 fair risk minimization through exponential Rényi mutual information framework defined below:<sup>1</sup>

$$\min_{\theta} \left\{ \text{FRMI}(\theta) := \mathbb{E}_{\mathbf{X}, Y, S} \{ \ell(\mathbf{X}, Y; \theta) \} + \lambda D_R(\widehat{Y}(\mathbf{X}; \theta); S) \right\}, \quad (\text{FRMI obj.})$$

172 where  $\ell$  denotes the loss function, such as  $L_2$  loss or cross entropy loss;  $\lambda > 0$  is a scalar balancing  
 173 the accuracy versus fairness objectives;  $D_R(\widehat{Y}(\mathbf{X}; \theta); S)$  is the notion of ERMI given in Eq. (ERMI)  
 174 particularized to demographic parity (see Eq. (5)); and  $\widehat{Y}(\mathbf{X}; \theta)$  is the output of the learned model  
 175 (e.g., the output of a classification or a regression task, or the cluster number in a clustering task).  
 176 While  $\widehat{Y}(\mathbf{X}; \theta)$  inherently depends on  $\mathbf{X}$  and  $\theta$ , in the rest of this paper, we sometimes leave the  
 177 dependence of  $\widehat{Y}$  on  $\mathbf{X}$  and/or  $\theta$  implicit for brevity of notation. Notice that we have also left the  
 178 dependence of the loss on the predicted outcome  $\widehat{Y}$  implicit.

179 In practice, the true joint distribution of  $(\mathbf{X}, S, Y, \widehat{Y})$  is unknown and we only have  $N$  samples at  
 180 our disposal, making it impossible to solve FRMI. Let  $\{\mathbf{x}_i, s_i, y_i, \widehat{y}_i(\mathbf{x}_i; \theta)\}_{i \in [N]}$  denote the features,  
 181 sensitive attributes, targets, and the predictions of the model parameterized by  $\theta$  for these samples.  
 182 Mary et al. (2019) considered the same objective Eq. (FRMI obj.), and tried to empirically solve it  
 183 through a kernel approximation. We propose a completely different approach to solving this problem:  
 184 fair empirical risk minimization via exponential Rényi mutual information (FERMI). FERMI results  
 185 in a provably convergent algorithm, and empirically outperforms the algorithm by Mary et al. (2019).  
 186 It is straightforward to derive an unbiased estimate for  $\mathbb{E}_{\mathbf{X}, Y, S} \{ \ell(\mathbf{X}, Y; \theta) \}$  through the empirical  
 187 risk, e.g.,  $\frac{1}{|B|} \sum_{i \in B} \ell(\mathbf{x}_i, y_i; \theta)$  where  $B \subseteq [N]$  is a random minibatch of data points. However,  
 188 estimating  $D_R(\widehat{Y}, S)$  in the objective function in Eq. (FRMI obj.) is more difficult. In what follows,  
 189 we present our approach to deriving an *unbiased stochastic estimator* of  $D_R(\widehat{Y}, S)$  given a random  
 190 batch of data points  $B$ . The following theorem is the key tool we use to obtain an unbiased estimator:

191 **Theorem 4.** For discrete random variables  $\widehat{Y} = \widehat{Y}(\mathbf{X}; \theta)$  and  $S$  where  $\widehat{Y} \in [m], S \in [k]$ , we have

$$D_R(\widehat{Y}; S) = \max_{W \in \mathbb{R}^{k \times m}} \left\{ -\text{Tr}(W P_{\widehat{Y}} W^T) + 2 \text{Tr}(W P_{\widehat{Y}, S} P_S^{-1/2}) - 1 \right\}, \quad (4)$$

192 where  $P_{\widehat{Y}} = \text{diag}(p_{\widehat{Y}}(1), \dots, p_{\widehat{Y}}(m))$ ,  $P_S = \text{diag}(p_S(1), \dots, p_S(k))$ , and

$$P_{\widehat{Y}, S} = \begin{pmatrix} p_{\widehat{Y}, S}(1, 1) & \dots & p_{\widehat{Y}, S}(1, k) \\ \vdots & \ddots & \vdots \\ p_{\widehat{Y}, S}(m, 1) & \dots & p_{\widehat{Y}, S}(m, k) \end{pmatrix}.$$

193 Let  $\widehat{\mathbf{Y}}, \widehat{\mathbf{y}}_i \in \{0, 1\}^m$  and  $\mathbf{S}, \mathbf{s}_i \in \{0, 1\}^k$  be the one-hot encodings of  $\widehat{Y}, \widehat{y}_i$  and  $S, s_i$ , respectively.  
 194 Then, the above theorem implies that we can compute an unbiased estimate of Eq. (FRMI obj.):

<sup>1</sup>In this section, we present all results in the context of  $Z = 0$  and  $Z = \{0\}$  (demographic parity), leaving off all conditional expectations for clarity of presentation. The results are readily generalized for general  $(Z, \mathcal{Z})$  by using  $D_R(\widehat{Y}, S|Z \in \mathcal{Z})$  in Eq. (FRMI obj.); we have used the resulting algorithms for empirical experiments.

195 **Lemma 1** (Unbiased estimator of ERMI). Let  $(\mathbf{X}, S, Y, \widehat{Y}(\mathbf{X}; \boldsymbol{\theta}))$  be a random draw from  $P_{\mathbf{X}, S, Y, \widehat{Y}}$ .  
 196 Further, let

$$\psi(\mathbf{X}, S, Y, \widehat{Y}; \boldsymbol{\theta}, W) := -\text{Tr}(W \widehat{Y}(\mathbf{X}; \boldsymbol{\theta}) \widehat{Y}^T(\mathbf{X}; \boldsymbol{\theta}) W^T) + 2 \text{Tr}(W \widehat{Y}(\mathbf{X}; \boldsymbol{\theta}) \mathbf{S}^T P_s^{-1/2}) - 1.$$

197  
 198 Then,  $\max_{W \in \mathbb{R}^{k \times m}} \psi(\mathbf{X}, S, Y, \widehat{Y}; \boldsymbol{\theta}, W)$  is an unbiased estimator of ERMI in Eq. (FRMI obj.), i.e.,

$$\mathbb{E}_{\mathbf{X}, S, Y} \left\{ \max_{W \in \mathbb{R}^{k \times m}} \psi(\mathbf{X}, S, Y, \widehat{Y}; \boldsymbol{\theta}, W) \right\} = D_R(\widehat{Y}(\mathbf{X}; \boldsymbol{\theta}); S).$$

199 The stochastic estimator,  $\psi(\mathbf{X}, S, Y, \widehat{Y}; \boldsymbol{\theta}, W)$ , in Lemma 1 requires the knowledge of  $P_s$ , and  
 200 computation of  $P_s^{-1/2}$ . This can be estimated with high fidelity (for small to moderate sensitive set)  
 201 through a single initial pass over the entire dataset in practice. Hence, we consider it to be known.  
 202  
 203 Now, we are equipped to state the empirical objective function that we solve in this paper:

$$\min_{\boldsymbol{\theta}} \max_{W \in \mathbb{R}^{k \times m}} \left\{ \text{FERMI}(\boldsymbol{\theta}, W) := \frac{1}{N} \sum_{i \in [N]} [\ell(\mathbf{x}_i, y_i; \boldsymbol{\theta}) + \lambda \psi_i(\boldsymbol{\theta}, W)] \right\}, \quad (\text{FERMI obj.})$$

204 where

$$\psi_i(\boldsymbol{\theta}, W) := -\text{Tr}(W \widehat{y}_i(\mathbf{x}_i; \boldsymbol{\theta}) \widehat{y}_i^T(\mathbf{x}_i; \boldsymbol{\theta}) W^T) + 2 \text{Tr}(W \widehat{y}_i(\mathbf{x}_i; \boldsymbol{\theta}) \mathbf{s}_i^T P_s^{-1/2}) - 1.$$

205 In particular, Lemma 1 says that, for any  $N$ , Eq. (FERMI obj.) (and its gradients) is an *unbiased* and  
 206 *consistent* estimator of the Eq. (FRMI obj.) objective function (and its gradients) by an empirical  
 207 average over the minibatch. This is in contrast to the density estimation methods used by Mary et al.  
 208 (2019) and Baharlouei et al. (2020), which are biased but consistent. We will see in the experiments  
 209 that the unbiased estimator empirically offers large performance improvements.

210 This observations leads us to deriving a stochastic algorithm, presented in Algorithm 1, which is  
 guaranteed to converge for any batch size  $1 \leq |B| \leq N$  since the stochastic gradients are unbiased.

---

**Algorithm 1** (FERMI Algorithm). Two-Time Scale SGDA for solving FERMI objective

---

- 1: **Input:**  $\boldsymbol{\theta}^0 \in \mathbb{R}^{d_\theta}$ ,  $W^0 \in \mathcal{W} \subset \mathbb{R}^{k \times m}$ , step-sizes  $(\eta_\theta, \eta_w)$ , mini-batch  $B \subseteq [N]$ , fairness parameter  $\lambda \geq 0$ , iteration number  $R$ .
  - 2: **for**  $t = 0, 1, \dots, R$  **do**
  - 3:   Draw a mini-batch  $B$  of data points  $\{(\mathbf{x}_i, s_i, y_i)\}_{i \in B}$
  - 4:   Set  $\boldsymbol{\theta}^{t+1} \leftarrow \boldsymbol{\theta}^t - \frac{\eta_\theta}{|B|} \sum_{i \in B} [\nabla_{\boldsymbol{\theta}} \ell(\mathbf{x}_i, y_i; \boldsymbol{\theta}^t) + \lambda \nabla_{\boldsymbol{\theta}} \psi_i(\boldsymbol{\theta}^t, W^t)]$ .
  - 5:   Set  $W^{t+1} \leftarrow \Pi_{\mathcal{W}} \left( W^t + \frac{2\lambda\eta_w}{|B|} \sum_{i \in B} \left[ -W \widehat{y}_i(\mathbf{x}_i; \boldsymbol{\theta}^t) \widehat{y}_i^T(\mathbf{x}_i; \boldsymbol{\theta}^t) + P_s^{-1/2} \mathbf{s}_i \widehat{y}_i^T(\mathbf{x}_i; \boldsymbol{\theta}^t) \right] \right)$
  - 6: **end for**
  - 7: Pick  $\hat{t}$  uniformly at random from  $\{1, \dots, R\}$ .
  - 8: **Return:**  $\boldsymbol{\theta}^{\hat{t}}$ .
- 

211  
 212 **Theorem 5.** (Informal statement) Algorithm 1 converges to the set of  $\epsilon$ -first order stationary points  
 213 of the Eq. (FERMI obj.) objective in  $O(\frac{1}{\epsilon^4})$  iterations (stochastic gradient evaluations).

214 The formal statement of this theorem can be found in Theorem 10 in Appendix D. A faster convergence  
 215 rate of  $O(\frac{1}{\epsilon^3})$  could be obtained by using the (more complicated) SREDA method of Luo et al. (2020)  
 216 instead of SGDA to solve FERMI objective. We omit the details here. In the next section, we  
 217 numerically evaluate the performance FERMI algorithm in several numerical experiments.

## 218 5 Numerical experiments

### 219 5.1 Binary classification and binary sensitive attribute

220 For our first set of experiments, we evaluate the fairness-accuracy tradeoffs of FERMI in binary  
 221 classification problems with a binary sensitive attribute. This is a common setup, so we are able to  
 222 compare against many existing baseline methods (Zafar et al., 2017; Feldman et al., 2015; Kamishima  
 223 et al., 2011; Jiang et al., 2020; Hardt et al., 2016; Baharlouei et al., 2020; Rezaei et al., 2020; Donini  
 224 et al., 2018; Cho et al., 2020b). We run experiments on three data sets: Adult, German Credit, and  
 225 COMPAS. To implement FERMI, we train a logistic regression model (same model for all baselines)  
 226 with an ERMI regularizer. Details about the datasets and experiments can be found in Appendix E.

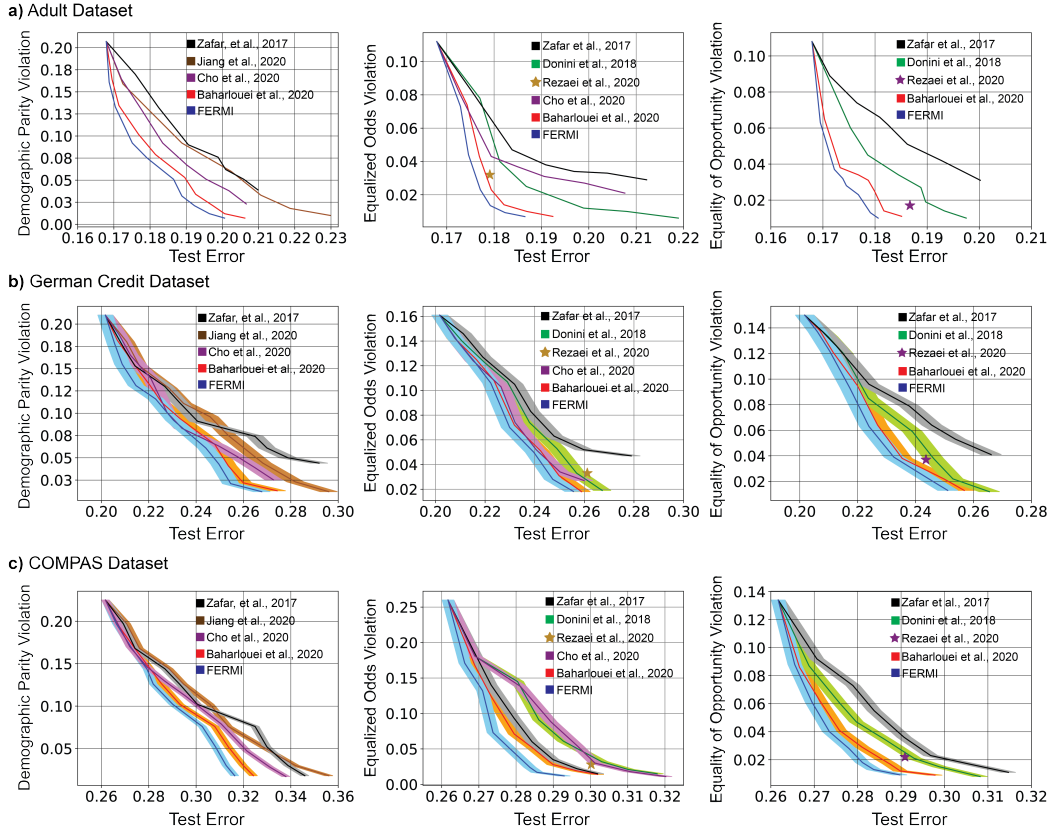

Figure 1: Binary classification with binary sensitive attribute using logistic regression. Tradeoff of fairness violation vs. test error for state-of-the-art fair classifiers on German Credit, Adult, and COMPAS datasets. FERMI offers the best fairness vs. accuracy tradeoff curve in all experiments against all baselines. Rezaei et al. (2020) only allow for a single output and do not yield a tradeoff curve. Further, the algorithms by Mary et al. (2019) and Baharlouei et al. (2020) are equivalent in this binary setting and shown by the red curve. FERMI, Mary et al. (2019) and Baharlouei et al. (2020) try to empirically solve the same risk function Eq. (FERMI obj.). However, the empirical formulation used by FERMI, Eq. (FERMI obj.) and its solver Eq. in a better performance even-though we are using a full-batch for all baselines in this experiment.

227 In Fig. 1, we report the fairness violation vs. test error, for three notions of fairness: demographic  
 228 parity, equalized odds, and equal opportunity. We have only included in-processing methods, which  
 229 outperform pre-processing and post-processing methods. Complete experimental results are included  
 230 in the appendix. We measure fairness violation through conditional demographic parity  $L_\infty$  violation  
 231 (Definition 9), conditional equal opportunity  $L_\infty$  violation (Definition 10) and its generalization,  
 232 conditional equalized odds violation. As can be seen, FERMI offers a fairness-accuracy tradeoff  
 233 curve that dominates all existing state-of-the-art baselines in each experiment and with respect to  
 234 each notion of fairness. This demonstrates the efficacy of having a strong regularizer such as ERMI:  
 235 by enforcing small ERMI violation, our model simultaneously achieves small fairness violation with  
 236 respect to these other notions which are upper bounded by ERMI.

237 It is noteworthy that the empirical objective function of Mary et al. (2019) and Baharlouei et al.  
 238 (2020) is exactly the same in this setting, and their algorithms also coincide to the red curve in  
 239 Fig. 1.<sup>2</sup> Additionally, like FERMI, they are trying to empirically solve Eq. (FERMI obj.), albeit  
 240 using different estimation techniques, i.e., their empirical objective is different from Eq. (FERMI  
 241 obj.). This demonstrates the effectiveness of our empirical formulation (FERMI obj.) – which is  
 242 both unbiased and consistent whereas theirs is biased. It also shows the effectiveness of our solver  
 243 (Algorithm 1) even-though we are using all baselines in full batch mode in this experiment. In the  
 244 following experiments, we will demonstrate that using smaller batch sizes results in much more  
 245 pronounced advantages of FERMI over these baselines.

<sup>2</sup>Exponential Rényi mutual information is equal to Rényi correlation for binary targets and/or binary sensitive attributes (see Theorem 2), which is the setting of all experiments in Sec. 5.1.

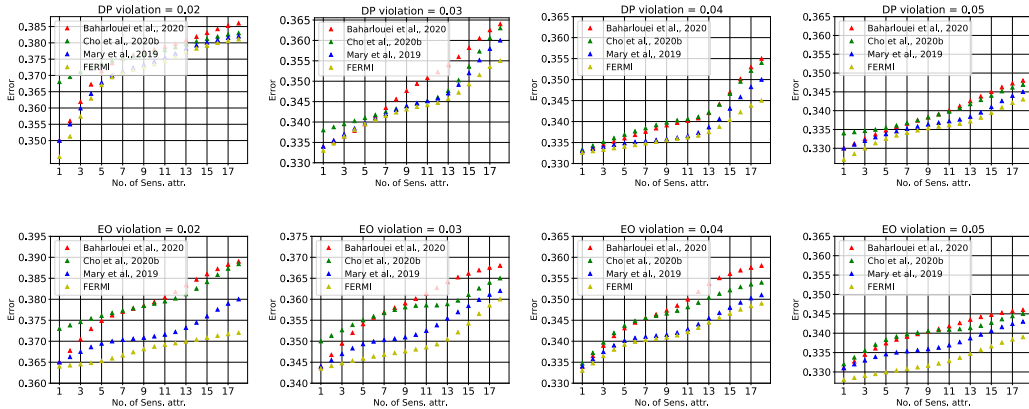

Figure 2: Comparison between FERMI, Mary et al. (2019), Baharlouei et al. (2020), and Cho et al. (2020b) on Communities dataset. (Mary et al., 2019) outperforms (Baharlouei et al., 2020; Cho et al., 2020b), which we believe could be attributed to the effectiveness of ERMI as a regularizer. FERMI outperforms Mary et al. (2019), which we attribute to our empirical formulation of ERMI and the effectiveness of its solver, given that we try to empirically solve the same risk function with different formulations.

## 246 5.2 Non-binary fair classification with a non-binary sensitive attribute

247 Next, we consider a non-binary classification problem with non-binary sensitive set. In this case, we  
 248 consider the Communities and Crime dataset, which has 18 binary sensitive attributes in total, and we  
 249 pick a subset of  $1, 2, 3, \dots, 18$  sensitive attributes out of those for our experiments, which corresponds  
 250 to  $|\mathcal{S}| \in \{2, 4, 8, \dots, 2^{18}\}$ . We discretize the target into three classes  $\{\text{high, medium, low}\}$ . The only  
 251 baselines that we are aware of that can handle non-binary classification with non-binary sensitive  
 252 attributes are (Mary et al., 2019), (Baharlouei et al., 2020), (Cho et al., 2020b), (Cho et al., 2020a),  
 253 and (Zhang et al., 2018). We used the publicly available implementations of (Baharlouei et al., 2020)  
 254 and (Cho et al., 2020b) and extended their binary classification algorithms to the non-binary setting.

255 The results are presented in Fig. 2, where we use conditional demographic parity  $L_\infty$  violation  
 256 (Definition 9) and conditional equal opportunity  $L_\infty$  violation (Definition 10) as the fairness violation  
 257 notions for the two experiments. For all baselines, test error increases as the number of sensitive  
 258 attributes increases. As can be seen, compared to the baselines, FERMI offers the most favorable test  
 259 error vs. fairness violation tradeoffs, particularly as the number of sensitive attributes increases and  
 260 for the more stringent fairness violation levels, e.g., 0.02.

## 261 5.3 Domain generalization through FERMI

262 In our last experiment, our goal is to showcase the efficacy of FERMI in stochastic optimization with  
 263 neural network approximation. For this experiment, we consider the Color MNIST dataset (Li &  
 264 Vasconcelos, 2019), where all 60,000 training MNIST digits are colored with different colors drawn  
 265 from a class conditional Gaussian distribution with variance  $\sigma$  around a certain average color for  
 266 each digit, while the test set remains black and white. Li & Vasconcelos (2019) show that as  $\sigma \rightarrow 0$ ,  
 267 a convolutional network model overfits significantly to each digit’s color on the training set, and  
 268 achieves vanishing training accuracy. However, the learned representation does not generalize to the  
 269 regular black and white test set, in absence of the spurious correlation between digits and color.

270 Conceptually, the goal of the classifier in this problem is to achieve high classification accuracy with  
 271 predictions that are independent of the color of the digit. We view color as the sensitive attribute  
 272 in this experiment, and apply fairness baselines for the demographic parity notion of fairness. One  
 273 would expect that by promoting such independence through a fairness regularizer generalization  
 274 would improve (i.e. lower test error on the black and white test set), at the cost of increased training  
 275 error (on the colored training set). We compare against Mary et al. (2019), Baharlouei et al. (2020),  
 276 and Cho et al. (2020b) as baselines in this experiment.

277 The results of this experiment are as illustrated in Fig. 3. The details about the dataset and experimental  
 278 setup is provided in Appendix E. In the left panel, we see that with no regularization ( $\lambda = 0$ ); the  
 279 test error is around 80%. As  $\lambda$  increases, all methods achieve smaller test error while training error  
 280 increases. We also observe that FERMI offers the best test error in this setup. In the right panel,  
 281 we observe that decreasing the batch size results in significantly worse generalization for all three



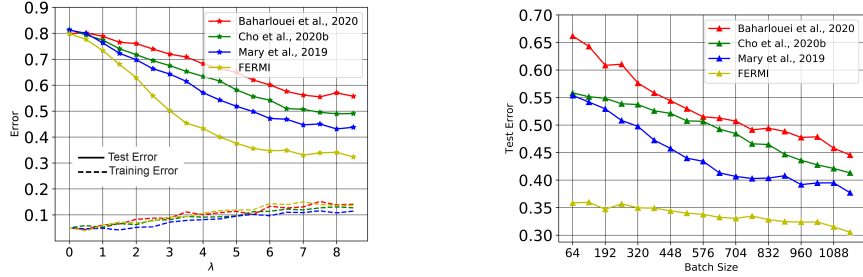

Figure 3: Domain generalization on Color MNIST (Li & Vasconcelos, 2019) using in-process fair algorithms for demographic parity. **Left panel:** The dashed line is the training error and the solid line is test error. As  $\lambda$  increases, fairness regularization results in a learned representation that is less dependent on color; hence training error increases while test error decreases (all algorithms reach a plateau around  $\lambda = 8$ ). We use  $|B| = 512$  for all baselines. **Right panel:** We plot test error vs. batch size using an optimized value of  $\lambda$  for each algorithm selected via a validation set. The performance of all baselines drops 10-20% as batch size becomes small whereas FERMI is relatively insensitive to batch size.

282 baselines considered (due to their biased estimators for the regularizer). However, the impact is much  
 283 less on FERMI. In particular, the performance gap between FERMI and other baselines is more than  
 284 20% for  $|B| = 64$ . Finally, FERMI with minibatch size  $|B| = 64$  still outperforms all other baselines  
 285 with  $|B| > 1,000$ . Finally, notice that the test error achieved by FERMI when  $\sigma = 0$  is  $\sim 30\%$ , as  
 286 compared to more than 50% obtained using REPAIR (Li & Vasconcelos, 2019) for  $\sigma \leq 0.05$ .

## 287 6 Discussion & concluding remarks

288 In this paper, we studied three variants of a notion of fairness violation, called exponential Rényi  
 289 mutual information (ERMI), developed for demographic parity, equalized odds, and equal opportunity  
 290 notions of fairness. We showed that ERMI is a strong fairness violation divergence providing upper  
 291 bound guarantees on other popular violation divergences, namely Shannon mutual information,  
 292 Rényi mutual information (Theorem 1), Pearson correlation, Rényi correlation (Theorem 2), and  $L_q$   
 293 distance violation (Theorem 3).

294 We derived an unbiased estimator for ERMI (Lemma 1), based on which we formulated an empirical  
 295 objective (FERMI obj.) for solving fair empirical risk minimization with ERMI regularization  
 296 to balance performance and fairness. We provided a stochastic algorithm for solving FERMI  
 297 (Algorithm 1) and proved its convergence (Theorem 5); for non-binary sensitive attributes, non-binary  
 298 target variables, regardless of the batch size. From an experimental perspective, we showed that  
 299 FERMI leads to better fairness-accuracy tradeoffs than all of the state-of-the-art baselines on a wide  
 300 variety of binary and non-binary classification tasks (for demographic parity, equalized odds, and  
 301 equal opportunity). We also showed that these benefits are particularly significant when the number of  
 302 sensitive attributes grows or the batch size is small. In particular, we observed that FERMI consistently  
 303 outperforms Mary et al. (2019) (which tries to empirically solve the same objective Eq. (FERMI obj.))  
 304 by up to 20% when the batch size is small, suggesting that the unbiasedness of the FERMI estimator  
 305 is essential in achieving good empirical performance.

306 There are several possible explanations for the superior empirical performance of FERMI compared  
 307 to baselines. One possible reason is that the objective function Eq. (FERMI obj.) is easier to optimize  
 308 than the objectives of competing in-processing methods: ERMI is smooth; and in the discrete case, is  
 309 equal to the trace of a matrix (see Theorem 7; appendix), which is easy to compute. Contrast this with  
 310 the larger computational overhead of Rényi correlation used by Baharlouei et al. (2020), for example,  
 311 which requires finding the second singular value of a matrix. Furthermore, the sample complexity of  
 312 estimating Rényi mutual information of order 2 (and consequently that of ERMI) scales as  $\Theta(\sqrt{|\mathcal{S}|})$   
 313 as compared to Shannon mutual information which scales as  $\Theta(|\mathcal{S}|/\log |\mathcal{S}|)$  (Acharya et al., 2014).  
 314 Moreover, the fact that ERMI is a stronger fairness violation seems to imply that FERMI would  
 315 generalize well to other fairness notions, a hypothesis that is supported by our experimental results.  
 316 Together, these facts suggest that ERMI serves as an efficient and easily optimizable proxy for these  
 317 other fairness notions, making Eq. (FERMI obj.) a good surrogate objective to optimize for all three  
 318 notions of fairness considered (demographic parity, equalized odds, and equal opportunity). We leave  
 319 it as future work to rigorously understand which of these (or other) factors are most responsible for  
 320 the favorable performance tradeoffs observed from FERMI.

## 321 References

- 322 Acharya, J., Orlitsky, A., Suresh, A. T., and Tyagi, H. The complexity of estimating Rényi entropy.  
323 *arXiv:1408.1000v1*, 2014.
- 324 Aghaei, S., Azizi, M. J., and Vayanos, P. Learning optimal and fair decision trees for non-  
325 discriminative decision-making. In *Proceedings of the AAAI Conference on Artificial Intelligence*,  
326 volume 33, pp. 1418–1426, 2019.
- 327 Angwin, J., Larson, J., Mattu, S., and Kirchner, L. Machine bias. *ProPublica*, 2016.
- 328 Baharlouei, S., Nouiehed, M., Beirami, A., and Razaviyayn, M. Rényi fair inference. In *ICLR*, 2020.
- 329 Bechavod, Y. and Ligett, K. Penalizing unfairness in binary classification. *arXiv preprint*  
330 *arXiv:1707.00044*, 2017.
- 331 Bechavod, Y., Ligett, K., Roth, A., Waggoner, B., and Wu, Z. S. Equal opportunity in online  
332 classification with partial feedback. *arXiv preprint arXiv:1902.02242*, 2019.
- 333 Berk, R., Heidari, H., Jabbari, S., Joseph, M., Kearns, M., Morgenstern, J., Neel, S., and Roth, A. A  
334 convex framework for fair regression. *arXiv preprint arXiv:1706.02409*, 2017.
- 335 Bolukbasi, T., Chang, K.-W., Zou, J. Y., Saligrama, V., and Kalai, A. T. Man is to computer  
336 programmer as woman is to homemaker? debiasing word embeddings. In *Advances in neural*  
337 *information processing systems*, pp. 4349–4357, 2016.
- 338 Calmon, F., Makhdoumi, A., Médard, M., Varia, M., Christiansen, M., and Duffy, K. R. Principal  
339 inertia components and applications. *IEEE Transactions on Information Theory*, 63(8):5011–5038,  
340 2017a.
- 341 Calmon, F., Wei, D., Vinzamuri, B., Ramamurthy, K. N., and Varshney, K. R. Optimized pre-  
342 processing for discrimination prevention. In *Advances in Neural Information Processing Systems*,  
343 pp. 3992–4001, 2017b.
- 344 Cho, J., Hwang, G., and Suh, C. A fair classifier using mutual information. In *2020 IEEE International*  
345 *Symposium on Information Theory (ISIT)*, pp. 2521–2526. IEEE, 2020a.
- 346 Cho, J., Hwang, G., and Suh, C. A fair classifier using kernel density estimation. In Larochelle,  
347 H., Ranzato, M., Hadsell, R., Balcan, M., and Lin, H. (eds.), *Advances in Neural Information*  
348 *Processing Systems 33: Annual Conference on Neural Information Processing Systems 2020*,  
349 *NeurIPS 2020, December 6-12, 2020, virtual*, 2020b.
- 350 Chzhen, E. and Schreuder, N. A minimax framework for quantifying risk-fairness trade-off in  
351 regression. *arXiv preprint arXiv:2007.14265*, 2020.
- 352 Cover, T. M. and Thomas, J. A. Information theory and statistics. *Elements of Information Theory*, 1  
353 (1):279–335, 1991.
- 354 Csiszár, I. and Shields, P. C. *Information theory and statistics: A tutorial*. Now Publishers Inc, 2004.
- 355 Datta, A., Tschantz, M. C., and Datta, A. Automated experiments on ad privacy settings. *Proceedings*  
356 *on privacy enhancing technologies*, 2015(1):92–112, 2015.
- 357 Dembo, A. and Zeitouni, O. *Large deviations techniques and applications*. Springer Science &  
358 Business Media, 2009.
- 359 Donini, M., Oneto, L., Ben-David, S., Shawe-Taylor, J. S., and Pontil, M. Empirical risk minimization  
360 under fairness constraints. In *Advances in Neural Information Processing Systems*, pp. 2791–2801,  
361 2018.
- 362 Dwork, C., Hardt, M., Pitassi, T., Reingold, O., and Zemel, R. Fairness through awareness. In  
363 *Proceedings of the 3rd innovations in theoretical computer science conference*, pp. 214–226, 2012.
- 364 Feldman, M., Friedler, S. A., Moeller, J., Scheidegger, C., and Venkatasubramanian, S. Certifying  
365 and removing disparate impact. In *proceedings of the 21th ACM SIGKDD international conference*  
366 *on knowledge discovery and data mining*, pp. 259–268, 2015.

- 367 Fish, B., Kun, J., and Lelkes, Á. D. A confidence-based approach for balancing fairness and accuracy.  
 368 In *Proceedings of the 2016 SIAM International Conference on Data Mining*, pp. 144–152. SIAM,  
 369 2016.
- 370 Gebelein, H. Das statistische problem der korrelation als variations-und eigenwertproblem und  
 371 sein zusammenhang mit der ausgleichsrechnung. *ZAMM-Journal of Applied Mathematics and*  
 372 *Mechanics/Zeitschrift für Angewandte Mathematik und Mechanik*, 21(6):364–379, 1941.
- 373 Gari, V., Ruf, B., Lamprier, S., and Detryniecki, M. Fairness-aware neural Rényi minimization for  
 374 continuous features. *arXiv preprint arXiv:1911.04929*, 2019.
- 375 Gari, V., Hajouji, O. E., Lamprier, S., and Detryniecki, M. Learning unbiased representations via  
 376 Rényi minimization. *arXiv preprint arXiv:2009.03183*, 2020.
- 377 Hardt, M., Price, E., and Srebro, N. Equality of opportunity in supervised learning. In *Advances in*  
 378 *neural information processing systems*, pp. 3315–3323, 2016.
- 379 Hirschfeld, H. O. A connection between correlation and contingency. In *Proceedings of the*  
 380 *Cambridge Philosophical Society*, volume 31, pp. 520–524, 1935.
- 381 Jiang, R., Pacchiano, A., Stepleton, T., Jiang, H., and Chiappa, S. Wasserstein fair classification. In  
 382 *Uncertainty in Artificial Intelligence*, pp. 862–872. PMLR, 2020.
- 383 Kamiran, F., Calders, T., and Pechenizkiy, M. Discrimination aware decision tree learning. In *2010*  
 384 *IEEE International Conference on Data Mining*, pp. 869–874. IEEE, 2010.
- 385 Kamishima, T., Akaho, S., and Sakuma, J. Fairness-aware learning through regularization approach.  
 386 In *2011 IEEE 11th International Conference on Data Mining Workshops*, pp. 643–650. IEEE,  
 387 2011.
- 388 Kearns, M., Neel, S., Roth, A., and Wu, Z. S. Preventing fairness gerrymandering: Auditing and  
 389 learning for subgroup fairness. In *International Conference on Machine Learning*, pp. 2564–2572,  
 390 2018.
- 391 Kilbertus, N., Rodriguez, M. G., Schölkopf, B., Muandet, K., and Valera, I. Fair decisions despite  
 392 imperfect predictions. In Chiappa, S. and Calandra, R. (eds.), *Proceedings of the Twenty Third*  
 393 *International Conference on Artificial Intelligence and Statistics*, volume 108 of *Proceedings of*  
 394 *Machine Learning Research*, pp. 277–287. PMLR, 26–28 Aug 2020.
- 395 Lecun, Y., Bottou, L., Bengio, Y., and Haffner, P. Gradient-based learning applied to document  
 396 recognition. *Proceedings of the IEEE*, 86(11):2278–2324, 1998. doi: 10.1109/5.726791.
- 397 Li, Y. and Vasconcelos, N. REPAIR: Removing representation bias by dataset resampling. In  
 398 *Proceedings of the IEEE Conference on Computer Vision and Pattern Recognition*, pp. 9572–9581,  
 399 2019.
- 400 Lin, T., Jin, C., and Jordan, M. I. On gradient descent ascent for nonconvex-concave minimax  
 401 problems. *arXiv: 1906.00331v6*, 2020.
- 402 Luo, L., Ye, H., and Zhang, T. Stochastic recursive gradient descent ascent for stochastic nonconvex-  
 403 strongly-concave minimax problems. *arXiv: 2001.03724*, 2020.
- 404 Mary, J., Calauzenes, C., and El Karoui, N. Fairness-aware learning for continuous attributes and  
 405 treatments. In *International Conference on Machine Learning*, pp. 4382–4391. PMLR, 2019.
- 406 Pérez-Suay, A., Laparra, V., Mateo-García, G., Muñoz-Marí, J., Gómez-Chova, L., and Camps-Valls,  
 407 G. Fair kernel learning. In *Joint European Conference on Machine Learning and Knowledge*  
 408 *Discovery in Databases*, pp. 339–355. Springer, 2017.
- 409 Pleiss, G., Raghavan, M., Wu, F., Kleinberg, J., and Weinberger, K. Q. On fairness and calibration.  
 410 In *Advances in Neural Information Processing Systems*, pp. 5680–5689, 2017.
- 411 Raff, E., Sylvester, J., and Mills, S. Fair forests: Regularized tree induction to minimize model bias.  
 412 In *Proceedings of the 2018 AAAI/ACM Conference on AI, Ethics, and Society*, pp. 243–250, 2018.

- 413 Rényi, A. On measures of dependence. *Acta Mathematica Academiae Scientiarum Hungarica*, 10  
414 (3-4):441–451, 1959.
- 415 Rényi, A. On measures of entropy and information. In *Proceedings of the Fourth Berkeley Symposium*  
416 *on Mathematical Statistics and Probability, Volume 1: Contributions to the Theory of Statistics*.  
417 The Regents of the University of California, 1961.
- 418 Rezaei, A., Fathony, R., Memarrast, O., and Ziebart, B. D. Fairness for robust log loss classification.  
419 In *AAAI*, pp. 5511–5518, 2020.
- 420 Steinberg, D., Reid, A., O’Callaghan, S., Lattimore, F., McCalman, L., and Caetano, T. Fast fair  
421 regression via efficient approximations of mutual information. *arXiv preprint arXiv:2002.06200*,  
422 2020.
- 423 Sweeney, L. Discrimination in online ad delivery. *arXiv preprint arXiv:1301.6822*, 2013.
- 424 Taskesen, B., Nguyen, V. A., Kuhn, D., and Blanchet, J. A distributionally robust approach to fair  
425 classification. *arXiv preprint arXiv:2007.09530*, 2020.
- 426 Williamson, R. and Menon, A. Fairness risk measures. In *International Conference on Machine*  
427 *Learning*, pp. 6786–6797. PMLR, 2019.
- 428 Witsenhausen, H. S. On sequences of pairs of dependent random variables. *SIAM Journal on Applied*  
429 *Mathematics*, 28(1):100–113, 1975.
- 430 Woodworth, B., Gunasekar, S., Ohanessian, M. I., and Srebro, N. Learning non-discriminatory  
431 predictors. *arXiv preprint arXiv:1702.06081*, 2017.
- 432 Zafar, M. B., Valera, I., Ródriguez, M. G., and Gummadi, K. P. Fairness constraints: Mechanisms for  
433 fair classification. In *Artificial Intelligence and Statistics*, pp. 962–970. PMLR, 2017.
- 434 Zemel, R., Wu, Y., Swersky, K., Pitassi, T., and Dwork, C. Learning fair representations. In  
435 *International Conference on Machine Learning*, pp. 325–333, 2013.
- 436 Zhang, B. H., Lemoine, B., and Mitchell, M. Mitigating unwanted biases with adversarial learning.  
437 In *Proceedings of the 2018 AAAI/ACM Conference on AI, Ethics, and Society*, pp. 335–340, 2018.

438 **Checklist**

- 439 1. For all authors...
- 440 (a) Do the main claims made in the abstract and introduction accurately reflect the paper's  
441 contributions and scope? [Yes]
- 442 (b) Did you describe the limitations of your work? [Yes]
- 443 (c) Did you discuss any potential negative societal impacts of your work? [Yes]
- 444 (d) Have you read the ethics review guidelines and ensured that your paper conforms to  
445 them? [Yes]
- 446 2. If you are including theoretical results...
- 447 (a) Did you state the full set of assumptions of all theoretical results? [Yes]
- 448 (b) Did you include complete proofs of all theoretical results? [Yes]
- 449 3. If you ran experiments...
- 450 (a) Did you include the code, data, and instructions needed to reproduce the main experi-  
451 mental results (either in the supplemental material or as a URL)? [Yes]
- 452 (b) Did you specify all the training details (e.g., data splits, hyperparameters, how they  
453 were chosen)? [Yes]
- 454 (c) Did you report error bars (e.g., with respect to the random seed after running experi-  
455 ments multiple times)? [Yes]
- 456 (d) Did you include the total amount of compute and the type of resources used (e.g., type  
457 of GPUs, internal cluster, or cloud provider)? [No]
- 458 4. If you are using existing assets (e.g., code, data, models) or curating/releasing new assets...
- 459 (a) If your work uses existing assets, did you cite the creators? [Yes]
- 460 (b) Did you mention the license of the assets? [N/A]
- 461 (c) Did you include any new assets either in the supplemental material or as a URL? [No]
- 462 (d) Did you discuss whether and how consent was obtained from people whose data you're  
463 using/curating? [No]
- 464 (e) Did you discuss whether the data you are using/curating contains personally identifiable  
465 information or offensive content? [No]
- 466 5. If you used crowdsourcing or conducted research with human subjects...
- 467 (a) Did you include the full text of instructions given to participants and screenshots, if  
468 applicable? [N/A]
- 469 (b) Did you describe any potential participant risks, with links to Institutional Review  
470 Board (IRB) approvals, if applicable? [N/A]
- 471 (c) Did you include the estimated hourly wage paid to participants and the total amount  
472 spent on participant compensation? [N/A]

473 **Appendix**

474 We provide a simple table of contents below for easier navigation of the appendix.

475 **CONTENTS**

476 **Section A: Existing notions of fairness**

477 **Section B: Properties and special cases of ERMI**

478 **Section C: Relations between ERMI and other fairness violation notions**

479 **Section D: FERMI: objective and algorithm**

480 **Section E: Experiment details & additional results**

481     Section E.1: Model description

482     Section E.2: More comparison to (Mary et al., 2019)

483     Section E.3: Performance in the presence of outliers & class-imbalance

484     Section E.4: Effect of hyperparameter  $\lambda$  on the accuracy-fairness tradeoffs

485     Section E.5: Complete version of Figure 1 (with pre-processing and post-processing baselines)

486     Section E.6: Description of datasets

487 **Section F: Anonymized code for experiments**

488 **A Existing notions of fairness**

489 Let  $(Y, \hat{Y}, \mathcal{A}, S)$  denote the true target, predicted target, the advantaged outcome class, and the  
490 sensitive attribute, respectively. We review three major notions of fairness.

491 **Definition 6** (demographic parity (Dwork et al., 2012)). *We say that a learning machine satisfies*  
492 *demographic parity if  $\hat{Y}$  is independent of  $S$ .*

493 **Definition 7** (equalized odds (Hardt et al., 2016)). *We say that a learning machine satisfies equalized*  
494 *odds, if  $\hat{Y}$  is conditionally independent of  $S$  given  $Y$ .*

495 **Definition 8** (equal opportunity (Hardt et al., 2016)). *We say that a learning machine satisfies equal*  
496 *opportunity with respect to  $\mathcal{A}$ , if  $\hat{Y}$  is conditionally independent of  $S$  given  $Y = y$  for all  $y \in \mathcal{A}$ .*

497 Notice that the equal opportunity as defined here generalizes the definition in (Hardt et al., 2016).  
498 It recovers equalized odds if  $\mathcal{A} = \mathcal{Y}$ , and it recovers equal opportunity of (Hardt et al., 2016) for  
499  $\mathcal{A} = \{1\}$  in binary classification.

## 500 B Properties and special cases of ERMI

501 Notice that ERMI is in fact the  $\chi^2$ -divergence between the conditional joint distribution,  $p_{\hat{Y},S}$ , and  
 502 the Kronecker product of conditional marginals,  $p_{\hat{Y}} \otimes p_S$ , where the conditioning is on  $Z \in \mathcal{Z}$ .  
 503 Further,  $\chi^2$ -divergence is an  $f$ -divergence with  $f(t) = (t - 1)^2$ . See (Csiszár & Shields, 2004,  
 504 Section 4) for a discussion. As an immediate result of this observation and well-known properties of  
 505  $f$ -divergences, we can state the following property of ERMI:

506 **Remark 6.**  $D_R(\hat{Y}; S|Z \in \mathcal{Z}) \geq 0$  with equality if and only if for all  $z \in \mathcal{Z}$ ,  $\hat{Y}$  and  $S$  are  
 507 conditionally independent given  $Z = z$ .

508 To further clarify the definition of ERMI, especially as it relates to demographic parity, equalized  
 509 odds, and equal opportunity, we will unravel the definition explicitly in a few special cases.

510 First, let  $Z = 0$  and  $\mathcal{Z} = \{0\}$ . In this case,  $Z \in \mathcal{Z}$  trivially holds, and conditioning on  $Z$  has no  
 511 effect, resulting in:

$$\begin{aligned} D_R(\hat{Y}; S) &:= D_R(\hat{Y}; S|Z \in \mathcal{Z}) \Big|_{Z=0, \mathcal{Z}=\{0\}} \\ &= \mathbb{E}_{\hat{Y}, S} \left\{ \frac{p_{\hat{Y}, S}(\hat{Y}, S)}{p_{\hat{Y}}(\hat{Y})p_S(S)} \right\} - 1 \\ &= \sum_{s \in \mathcal{S}} \int_{\hat{y} \in \mathcal{Y}} \frac{p_{\hat{Y}, S}(\hat{y}, s) - p_{\hat{Y}}(\hat{y})p_S(s)}{p_{\hat{Y}}(\hat{y})p_S(s)} p_{\hat{Y}, S}(\hat{y}, s) d\hat{y}. \end{aligned} \quad (5)$$

512  $D_R(\hat{Y}; S)$  is the notion of ERMI that should be used when the desired notion of fairness is de-  
 513 mographic parity. In particular,  $D_R(\hat{Y}; S) = 0$  implies that  $\chi^2$  divergence between  $p_{\hat{Y}, S}$ , and the  
 514 Kronecker product of marginals,  $p_{\hat{Y}} \otimes p_S$  is zero. This in turn implies that  $\hat{Y}$  and  $S$  are independent,  
 515 which is the definition of demographic parity. We note that when  $\hat{Y}$  and  $S$  are discrete, this special  
 516 case ( $Z = 0$  and  $\mathcal{Z} = \{0\}$ ) of ERMI is referred to as  $\chi^2$ -information by Calmon et al. (2017a).

517 Next, we consider  $Z = Y$  and  $\mathcal{Z} = \mathcal{Y}$ . In this case,  $Z \in \mathcal{Z}$  is trivially satisfied, and hence,

$$\begin{aligned} D_R(\hat{Y}; S|Y) &:= D_R(\hat{Y}; S|Z \in \mathcal{Z}) \Big|_{Z=Y, \mathcal{Z}=\mathcal{Y}} \\ &= \mathbb{E}_{Y, \hat{Y}, S} \left\{ \frac{p_{\hat{Y}, S|Y}(\hat{Y}, S|Y)}{p_{\hat{Y}|Y}(\hat{Y}|Y)p_{S|Y}(S|Y)} \right\} - 1 \\ &= \sum_{s \in \mathcal{S}} \int_{y \in \mathcal{Y}} \int_{\hat{y} \in \mathcal{Y}} \frac{p_{\hat{Y}, S|Y}(\hat{y}, s|y) - p_{\hat{Y}|Y}(\hat{y}|y)p_{S|Y}(s|y)}{p_{\hat{Y}|Y}(\hat{y}|y)p_{S|Y}(s|y)} p_{Y, \hat{Y}, S}(y, \hat{y}, s) d\hat{y} dy \\ &= \sum_{s \in \mathcal{S}} \int_{y \in \mathcal{Y}} \int_{\hat{y} \in \mathcal{Y}} \frac{p_{\hat{Y}, S|Y}(\hat{y}, s|y)^2}{p_{\hat{Y}|Y}(\hat{y}|y)p_{S|Y}(s|y)} p_Y(y) d\hat{y} dy - 1. \end{aligned} \quad (6)$$

518  $D_R(\hat{Y}; S|Y)$  should be used when the desired notion of fairness is equalized odds. In particular,  
 519  $D_R(\hat{Y}; S|Y) = 0$  directly implies the conditional independence of  $\hat{Y}$  and  $S$  given  $Y$ .

520 Finally, we consider  $Z = Y$  and  $\mathcal{Z} = \mathcal{A}$ . In this case, we have

$$\begin{aligned} D_R^{\mathcal{A}}(\hat{Y}; S|Y) &:= D_R(\hat{Y}; S|Z \in \mathcal{Z}) \Big|_{Z=Y, \mathcal{Z}=\mathcal{A}} \\ &= \mathbb{E}_{Y, \hat{Y}, S} \left\{ \frac{p_{\hat{Y}, S|Y}(\hat{Y}, S|Y)}{p_{\hat{Y}|Y}(\hat{Y}|Y)p_{S|Y}(S|Y)} \Big| Y \in \mathcal{A} \right\} - 1 \\ &= \sum_{s \in \mathcal{S}} \int_{y \in \mathcal{A}} \int_{\hat{y} \in \mathcal{Y}} \frac{p_{\hat{Y}, S|Y}(\hat{y}, s|y) - p_{\hat{Y}|Y}(\hat{y}|y)p_{S|Y}(s|y)}{p_{\hat{Y}|Y}(\hat{y}|y)p_{S|Y}(s|y)} p_Y^{\mathcal{A}}(y) d\hat{y} dy \\ &= \sum_{s \in \mathcal{S}} \int_{y \in \mathcal{A}} \int_{\hat{y} \in \mathcal{Y}} \frac{p_{\hat{Y}, S|Y}(\hat{y}, s|y)^2}{p_{\hat{Y}|Y}(\hat{y}|y)p_{S|Y}(s|y)} p_{\hat{Y}, S|Y}(\hat{y}, s|y) p_Y^{\mathcal{A}}(y) d\hat{y} dy - 1, \end{aligned} \quad (7)$$



521 where

$$p_Y^A(y) := \frac{p_Y(y)}{\int_{y' \in \mathcal{A}} p_Y(y') dy'}. \quad (8)$$

522 This notion is what should be used when the desired notion of fairness is equal opportunity. This  
 523 can be further simplified when the advantaged class is a singleton (which is the case in binary  
 524 classification). If  $Z = Y$  and  $\mathcal{Z} = \{y\}$ , then

$$\begin{aligned} D_R(\hat{Y}; S|Y = y) &:= D_R^{\{y\}}(\hat{Y}; S|Y) \\ &= \sum_{s \in \mathcal{S}} \int_{\hat{y} \in \mathcal{Y}} \frac{p_{\hat{Y}, S|Y}(\hat{y}, s|y) - p_{\hat{Y}|Y}(\hat{y}|y)p_{S|Y}(s|y)}{p_{\hat{Y}|Y}(\hat{y}|y)p_{S|Y}(s|y)} p_{\hat{Y}, S|Y}(\hat{y}, s|y) d\hat{y} \\ &= \sum_{s \in \mathcal{S}} \int_{\hat{y} \in \mathcal{Y}} \frac{p_{\hat{Y}, S|Y}(\hat{y}, s|y)^2}{p_{\hat{Y}|Y}(\hat{y}|y)p_{S|Y}(s|y)} d\hat{y} - 1. \end{aligned} \quad (9)$$

525 Finally, we note that we use the notation  $D_R(\hat{Y}; S|Y)$  and  $D_R(\hat{Y}; S|Y = y)$  to be consistent with  
 526 the definition of conditional mutual information in (Cover & Thomas, 1991).

527 **C Relations between ERMI and other fairness violation notions**

528 *Proof of Theorem 1.* We proceed to prove all the (in)equalities one by one:

- 529 •  $0 \leq I_S(\widehat{Y}; S|Z \in \mathcal{Z})$ . This is well known and the proof can be found in any information  
 530 theory textbook (Cover & Thomas, 1991).
- 531 •  $I_1(\widehat{Y}; S|Z \in \mathcal{Z}) \leq I_2(\widehat{Y}; S|Z \in \mathcal{Z})$ . This is a known property of Rényi mutual information,  
 532 but we provide a proof for completeness in Lemma 2.
- 533 •  $I_2(\widehat{Y}; S|Z \in \mathcal{Z}) \leq e^{I_2(\widehat{Y}; S|Z \in \mathcal{Z})} - 1$ . This follows from the fact that  $x \leq e^x - 1$ .
- 534 •  $e^{I_2(\widehat{Y}; S|Z \in \mathcal{Z})} - 1 = D_R(\widehat{Y}; S|Z \in \mathcal{Z})$ . This follows from simple algebraic manipulation.

535 □

536 **Lemma 2.** Let  $\widehat{Y}, S, Z$  be discrete or continuous random variables. Then:

- 537 (a) For any  $\alpha, \beta \in [1, \infty]$ ,  $I_\beta(\widehat{Y}; S|Z \in \mathcal{Z}) \geq I_\alpha(\widehat{Y}; S|Z \in \mathcal{Z})$  if  $\beta > \alpha$ .
- 538 (b)  $\lim_{\alpha \rightarrow 1^+} I_\alpha(\widehat{Y}; S|Z \in \mathcal{Z}) = I_1(\widehat{Y}; S) := \mathbb{E}_Z \left\{ D_{KL}(p_{\widehat{Y}, S|Z} \| p_{\widehat{Y}|Z} \otimes p_{S|Z}) \mid Z \in \mathcal{Z} \right\}$ ,  
 539 where  $I_1(\cdot; \cdot)$  denotes the Shannon mutual information and  $D_{KL}$  is Kullback–Leibler diver-  
 540 gence (relative entropy).
- 541 (c) For all  $\alpha \in [1, \infty]$ ,  $I_\alpha(\widehat{Y}; S|Z \in \mathcal{Z}) \geq 0$  with equality if and only if for all  $z \in \mathcal{Z}$ ,  $\widehat{Y}$  and  
 542  $S$  are conditionally independent given  $z$ .

543 *Proof.* (a) First assume  $0 < \alpha < \beta < \infty$  and that  $\alpha, \beta \neq 1$ . Define  $a = \alpha - 1$ , and  $b = \beta - 1$ . Then  
 544 the function  $\phi(t) = t^{b/a}$  is convex for all  $t \geq 0$ , so by Jensen’s inequality we have:

$$\begin{aligned} \frac{1}{b} \log \left( \mathbb{E} \left\{ \left( \frac{p(\widehat{Y}, S|Z)}{p(\widehat{Y}|Z)p(S|Z)} \right)^b \mid Z \in \mathcal{Z} \right\} \right) &\geq \frac{1}{b} \log \left( \mathbb{E} \left\{ \left( \frac{p(\widehat{Y}, S|Z)}{p(\widehat{Y}|Z)p(S|Z)} \right)^a \mid Z \in \mathcal{Z} \right\}^{b/a} \right) \\ &= \frac{1}{a} \log \left( \mathbb{E} \left\{ \left( \frac{p(\widehat{Y}, S|Z)}{p(\widehat{Y}|Z)p(S|Z)} \right)^a \mid Z \in \mathcal{Z} \right\} \right). \end{aligned} \tag{10}$$

545 Now suppose  $\alpha = 1$ . Then by the monotonicity for  $\alpha \neq 1$  proved above, we have  
 546  $I_1(\widehat{Y}; S) = \lim_{\alpha \rightarrow 1^-} I_\alpha(\widehat{Y}; S) = \sup_{\alpha \in (0, 1)} I_\alpha(\widehat{Y}; S) \leq \inf_{\alpha > 1} I_\alpha(\widehat{Y}; S)$ . Also,  $I_\infty(\widehat{Y}; S) =$   
 547  $\lim_{\alpha \rightarrow \infty} I_\alpha(\widehat{Y}; S) = \sup_{\alpha > 0} I_\alpha(\widehat{Y}; S)$ .

548 (b) This is a standard property of the cumulant generating function (see (Dembo & Zeitouni, 2009)).

549 (c) It is straightforward to observe that independence implies that Rényi mutual information vanishes.  
 550 On the other hand, if Rényi mutual information vanishes, then part (a) implies that Shannon mutual  
 551 information also vanishes, which implies the desired conditional independence. □

552 *Proof of Theorem 2.* The proof is completed using the following pieces.

- 553 •  $0 \leq |\rho(\widehat{Y}, S|Z \in \mathcal{Z})| \leq \rho_R(\widehat{Y}, S|Z \in \mathcal{Z})$ . This is obvious from the definition of  
 554  $\rho_R(\widehat{Y}, S|Z \in \mathcal{Z})$ .
- 555 •  $\rho_R(\widehat{Y}, S|Z \in \mathcal{Z}) \leq D_R(\widehat{Y}; S|Z \in \mathcal{Z})$ . This follows from Theorem 7.
- 556 • Notice that if  $|\mathcal{S}| = 2$ , Theorem 7 implies that  $D_R(\widehat{Y}; S|Z \in \mathcal{Z}) = \rho_R(\widehat{Y}, S|Z \in \mathcal{Z})$ .

557 □

558 **Theorem 7.** Suppose that  $\mathcal{S} = [k]$ . Let the  $k \times k$  matrix  $P$  be defined as  $P = \{P_{ij}\}_{i,j \in [k] \times [k]}$ , where

$$P_{ij} := \frac{1}{\sqrt{p_S(i)p_S(j)}} \int_{y \in \mathcal{Y}} \left( \frac{p_{\hat{Y},S}(y,i)p_{\hat{Y},S}(y,j)}{p_{\hat{Y}}(y)} \right) dy. \quad (11)$$

559 Let  $1 = \sigma_1 \geq \sigma_2 \geq \dots \geq \sigma_k \geq 0$  be the eigenvalues of  $P$ . Then,

$$\rho_R(\hat{Y}, S) = \sigma_2, \quad (12)$$

$$D_R(\hat{Y}; S) = \text{Tr}(P) - 1 = \sum_{i=2}^k \sigma_i. \quad (13)$$

560 *Proof.* Eq. (12) is proved in (Witsenhausen, 1975, Section 3). To prove Eq. (13), notice that

$$\begin{aligned} \text{Tr}(P) &= \sum_{i \in [k]} P_{ii} \\ &= \sum_{i \in [k]} \frac{1}{p_S(i)} \int_{y \in \mathcal{Y}} \left( \frac{p_{\hat{Y},S}(y,i)^2}{p_{\hat{Y}}(y)} \right) dy \\ &= E_{\hat{Y},S} \left\{ \left( \frac{p_{\hat{Y},S}(\hat{Y}, S)}{p_{\hat{Y}}(\hat{Y})p_S(S)} \right) \right\} \\ &= 1 + D_R(\hat{Y}; S), \end{aligned}$$

561 which completes the proof.  $\square$

562 *Proof of Theorem 3.* It suffices to prove the inequality for  $L_1$ , as  $L_q$  is bounded above by  $L_1$  for  
563 all  $q \geq 1$ . The proof for the case where  $Z = 0$  and  $\mathcal{Z} = \{0\}$  follows from the following set of  
564 inequalities:

$$L_1(\hat{Y}, S | Z \in \mathcal{Z}) = \sum_{s \in \mathcal{S}} \int_{y \in \mathcal{Y}} |p_{\hat{Y},S}(y,s) - p_{\hat{Y}}(y)p_S(s)| dy \quad (14)$$

$$= \sum_{s \in \mathcal{S}} \int_{y \in \mathcal{Y}} \sqrt{p_{\hat{Y}}(y)p_S(s)} \frac{|p_{\hat{Y},S}(y,s) - p_{\hat{Y}}(y)p_S(s)|}{\sqrt{p_{\hat{Y}}(y)p_S(s)}} dy \quad (15)$$

$$\leq \sqrt{\left( \sum_{s \in \mathcal{S}} \int_{y \in \mathcal{Y}} p_{\hat{Y}}(y)p_S(s) dy \right) \left( \sum_{s \in \mathcal{S}} \int_{y \in \mathcal{Y}} \left( \frac{(p_{\hat{Y},S}(y,s) - p_{\hat{Y}}(y)p_S(s))^2}{p_{\hat{Y}}(y)p_S(s)} \right) \right)} \quad (16)$$

$$\leq \sqrt{\sum_{s \in \mathcal{S}} \int_{y \in \mathcal{Y}} \left( \frac{(p_{\hat{Y},S}(y,s) - p_{\hat{Y}}(y)p_S(s))^2}{p_{\hat{Y}}(y)p_S(s)} \right) dy} \quad (17)$$

$$= \sqrt{D_R(\hat{Y}; S)}, \quad (18)$$

565 where Eq. (16) follows from Cauchy-Schwarz inequality, and Eq. (18) follows from Lemma 3.

566 The extension to general  $Z$  and  $\mathcal{Z}$  is immediate by observing that  $\rho(\hat{Y}, S | Z \in \mathcal{Z}) =$

567  $\mathbb{E}_Z \left[ \rho(\hat{Y}, S | Z) \middle| Z \in \mathcal{Z} \right]$ ,  $\rho_R(\hat{Y}, S | Z \in \mathcal{Z}) = \mathbb{E}_Z \left[ \rho_R(\hat{Y}, S | Z) \middle| Z \in \mathcal{Z} \right]$ , and  $D_R(\hat{Y}, S | Z \in$

568  $\mathcal{Z}) = \mathbb{E}_Z \left[ D_R(\hat{Y}, S | Z) \middle| Z \in \mathcal{Z} \right]$ .

569  $\square$

570 **Lemma 3.** We have

$$D_R(\hat{Y}; S) = \sum_{s \in \mathcal{S}} \int_{y \in \mathcal{Y}} \left( \frac{(p_{\hat{Y},S}(y,s) - p_{\hat{Y}}(y)p_S(s))^2}{p_{\hat{Y}}(y)p_S(s)} \right) dy. \quad (19)$$

571

572 *Proof.* The proof follows from the following set of identities:

$$\begin{aligned} \sum_{s \in \mathcal{S}} \int_{y \in \mathcal{Y}} \left( \frac{(p_{\hat{Y}, S}(y, s) - p_{\hat{Y}}(y)p_S(s))^2}{p_{\hat{Y}}(y)p_S(s)} \right) dy &= \sum_{s \in \mathcal{S}} \int_{y \in \mathcal{Y}} \frac{(p_{\hat{Y}, S}(y, s))^2}{p_{\hat{Y}}(y)p_S(s)} dy \\ &\quad - 2 \sum_{s \in \mathcal{S}} \int_{y \in \mathcal{Y}} p_{\hat{Y}, S}(y, s) dy \\ &\quad + \sum_{s \in \mathcal{S}} \int_{y \in \mathcal{Y}} p_{\hat{Y}}(y)p_S(s) dy \end{aligned} \quad (20)$$

$$= E \left\{ \frac{p_{\hat{Y}, S}(\hat{Y}, S)}{p_{\hat{Y}}(\hat{Y})p_S(S)} \right\} - 1 \quad (21)$$

$$= D_R(\hat{Y}; S). \quad (22)$$

573

□

574 Next, we present some alternative fairness definitions and show that they are also upper bounded by  
575 ERMI.

576 **Definition 9** (conditional demographic parity  $L_\infty$  violation). *Given a predictor  $\hat{Y}$  supported on  $\mathcal{Y}$   
577 and a discrete sensitive attribute  $S$  supported on a finite set  $\mathcal{S}$ , we define the conditional demographic  
578 parity violation by:*

$$\tilde{d}p(\hat{Y}|S) := \sup_{\hat{y} \in \mathcal{Y}} \max_{s \in \mathcal{S}} \left| p_{\hat{Y}|S}(\hat{y}|s) - p_{\hat{Y}}(\hat{y}) \right|. \quad (23)$$

579

580 First, we show that  $\tilde{d}p(\hat{Y}|S)$  is a reasonable notion of fairness violation.

581 **Lemma 4.**  $\tilde{d}p(\hat{Y}|S) = 0$  iff (if and only if)  $\hat{Y}$  and  $S$  are independent.

582 *Proof.* By definition,  $\tilde{d}p(\hat{Y}|S) = 0$  iff for all  $\hat{y} \in \mathcal{Y}, s \in \mathcal{S}$ ,  $p_{\hat{Y}, S}(\hat{y}|s) = p_{\hat{Y}}(\hat{y})$  iff  $\hat{Y}$  and  $S$  are  
583 independent (since we always assume  $p(s) > 0$  for all  $s \in \mathcal{S}$ ). □

584 **Theorem 8** (ERMI is stronger than conditional demographic parity  $L_\infty$  violation). *Let  $\hat{Y}$  be a  
585 discrete or continuous random variable supported on  $\mathcal{Y}$ , and  $S$  be a discrete random variable  
586 supported on a finite set  $\mathcal{S}$ . Denote  $p_S^{\min} := \min_{s \in \mathcal{S}} p_S(s) > 0$ . Then,*

$$0 \leq \tilde{d}p(\hat{Y}|S) \leq \frac{1}{p_S^{\min}} \sqrt{D_R(\hat{Y}; S)}. \quad (24)$$

587

588 *Proof.* The proof follows from the following set of (in)equalities:

$$\left( \tilde{d}p(\hat{Y}|S) \right)^2 = \sup_{\hat{y} \in \mathcal{Y}} \max_{s \in \mathcal{S}} \left( p_{\hat{Y}|S}(\hat{y}|s) - p_{\hat{Y}}(\hat{y}) \right)^2 \quad (25)$$

$$\leq \frac{1}{(p_S^{\min})^2} \sup_{\hat{y} \in \mathcal{Y}} \max_{s \in \mathcal{S}} \left( p_{\hat{Y}, S}(\hat{y}, s) - p_{\hat{Y}}(\hat{y})p_S(s) \right)^2 \quad (26)$$

$$\leq \frac{1}{(p_S^{\min})^2} \int_{\hat{y} \in \mathcal{Y}} \sum_{s \in \mathcal{S}} \left( p_{\hat{Y}, S}(\hat{y}, s) - p_{\hat{Y}}(\hat{y})p_S(s) \right)^2 \quad (27)$$

$$= \frac{1}{(p_S^{\min})^2} D_R(\hat{Y}; S), \quad (28)$$

589 where Eq. (28) follows from Theorem 3. □

590 **Definition 10** (conditional equal opportunity  $L_\infty$  violation (Hardt et al., 2016)). *Let  $Y, \hat{Y}$  take values  
591 in  $\mathcal{Y}$  and let  $A \subseteq \mathcal{Y}$  be a compact subset denoting the advantaged outcomes (For example, the  
592 decision “to interview” an individual or classify an individual as a “low risk” for financial purposes).*

593 We define the conditional equal opportunity  $L_\infty$  violation of  $\widehat{Y}$  with respect to the sensitive attribute  
 594  $S$  and the advantaged outcome  $\mathcal{A}$  by

$$\tilde{e}o(\widehat{Y}|S, Y \in \mathcal{A}) := \mathbb{E}_Y \left\{ \sup_{\widehat{y} \in \mathcal{Y}} \max_{s \in \mathcal{S}} \left| p_{\widehat{Y}, S|Y}(\widehat{y}|s, Y) - p_{\widehat{Y}|Y}(\widehat{y}|Y) \right| \middle| Y \in \mathcal{A} \right\}. \quad (29)$$

595

596 **Theorem 9** (ERMI is stronger than conditional equal opportunity  $L_\infty$  violation). Let  $\widehat{Y}$ ,  $Y$ , be  
 597 discrete or continuous random variables supported on  $\mathcal{Y}$ , and let  $S$  be a discrete random variable  
 598 supported on a finite set  $\mathcal{S}$ . Let  $\mathcal{A} \subseteq \mathcal{Y}$  be a compact subset of  $\mathcal{Y}$ .

599 Denote  $p_{S|\mathcal{A}}^{\min} = \min_{s \in \mathcal{S}, y \in \mathcal{A}} p_{S|Y}(s|y)$ . Then,

$$0 \leq \tilde{e}o(\widehat{Y}|S, Y \in \mathcal{A}) \leq \frac{1}{p_{S|\mathcal{A}}^{\min}} \sqrt{D_R(\widehat{Y}; S|Y \in \mathcal{A})}. \quad (30)$$

600

601 *Proof.* Notice that the same proof for Theorem 8 would give that for all  $y \in \mathcal{A}$ :

$$\begin{aligned} 0 \leq \sup_{\widehat{y} \in \mathcal{Y}} \max_{s \in \mathcal{S}} \left| p_{\widehat{Y}, S|Y}(\widehat{y}|s, y) - p_{\widehat{Y}|Y}(\widehat{y}|y) \right| &:= \tilde{e}o(\widehat{Y}|S, Y = y) \\ &\leq \frac{1}{p_{S|y}^{\min}(y)} \sqrt{D_R(\widehat{Y}; S|Y = y)} \\ &\leq \frac{1}{p_{S|\mathcal{A}}^{\min}} \sqrt{D_R(\widehat{Y}; S|Y = y)}. \end{aligned}$$

602 Hence,

$$\begin{aligned} \tilde{e}o(\widehat{Y}|S, Y \in \mathcal{A}) &= \mathbb{E}_Y \left\{ \tilde{e}o(\widehat{Y}|S, Y) \middle| Y \in \mathcal{A} \right\} \\ &\leq \frac{1}{p_{S|\mathcal{A}}^{\min}} \mathbb{E}_Y \left\{ \sqrt{D_R(\widehat{Y}; S|Y)} \middle| Y \in \mathcal{A} \right\} \\ &\leq \frac{1}{p_{S|\mathcal{A}}^{\min}} \sqrt{\mathbb{E}_Y \left\{ D_R(\widehat{Y}; S|Y) \middle| Y \in \mathcal{A} \right\}} \\ &= \frac{1}{p_{S|\mathcal{A}}^{\min}} \sqrt{D_R(\widehat{Y}; S|Y \in \mathcal{A})}, \end{aligned}$$

603 where the last inequality follows from Jensen's inequality. This completes the proof.  $\square$

604 **D FERMI: objective and algorithm**

605 *Proof of Theorem 4.* Let  $W^* \in \arg \max_{W \in \mathbb{R}^{k \times m}} -\text{Tr}(WP_{\hat{y}}W^T) + 2\text{Tr}(WP_{\hat{y},s}P_s^{-1/2})$ . We will  
 606 compute  $W^*$  and plug it in the RHS of Eq. (4) to show the equality in Eq. (4). Setting the derivative  
 607 of the expression on the RHS equal to zero leads to:

$$-2WP_{\hat{y}} + 2P_s^{-1/2}P_{\hat{y},s}^T = 0 \implies W^* = P_{\hat{y}}^{-1}P_{\hat{y},s}^T P_s^{-1/2}.$$

608 Plugging this expression for  $W^*$ , we have

$$\begin{aligned} \max_{W \in \mathbb{R}^{k \times m}} & -\text{Tr}(WP_{\hat{y}}W^T) + 2\text{Tr}(WP_{\hat{y},s}P_s^{-1/2}) \\ & = -\text{Tr}(P_s^{-1/2}P_{\hat{y},s}^T P_{\hat{y}}^{-1}P_{\hat{y}}P_{\hat{y},s}^{-1}P_s^{-1/2}) + 2\text{Tr}(P_s^{-1/2}P_{\hat{y},s}^T P_{\hat{y}}^{-1}P_{\hat{y}}P_{\hat{y},s}^{-1}P_s^{-1/2}) \\ & = \text{Tr}(P_s^{-1/2}P_{\hat{y},s}^T P_{\hat{y}}^{-1}P_{\hat{y},s}P_s^{-1/2}) \\ & = \text{Tr}(P_s^{-1}P_{\hat{y},s}^T P_{\hat{y}}^{-1}P_{\hat{y},s}). \end{aligned}$$

609 Writing out the matrix multiplication explicitly in the last expression, we have

$$P_s^{-1}P_{\hat{y},s}^T P_{\hat{y}}^{-1}P_{\hat{y},s} = UV^T,$$

610 where  $U_{i,j} = \hat{p}_S(i)^{-1}\hat{p}_{\hat{Y},S}(j,i)$  and  $V_{i,j} = \hat{p}_{\hat{Y}}(j)^{-1}\hat{p}_{\hat{Y},S}(j,i)$ , for  $i \in [k], j \in [m]$ . Hence

$$\begin{aligned} \max_{W \in \mathbb{R}^{k \times m}} -\text{Tr}(WP_{\hat{y}}W^T) + 2\text{Tr}(WP_{\hat{y},s}P_s^{-1/2}) & = \text{Tr}(UV^T) \\ & = \sum_{i \in [k]} \sum_{j \in [m]} \frac{p_{\hat{Y},S}(j,i)^2}{p_S(i)p_{\hat{Y}}(j)} \\ & = D_R(\hat{Y}; S), \end{aligned}$$

611 which completes the proof.  $\square$

612 Next, we move to the statement and proof of the precise version of Theorem 5. We first recall some  
 613 basic definitions:

614 **Definition 11.** A function  $f$  is  $\beta$ -smooth if for all  $\mathbf{u}, \mathbf{u}'$ , we have  $\|\nabla f(\mathbf{u}) - \nabla f(\mathbf{u}')\| \leq \beta\|\mathbf{u} - \mathbf{u}'\|$ .

615 **Definition 12.** A point  $\theta$  is an  $\epsilon$ -stationary point of a differentiable function  $\Phi$  if  $\|\nabla \Phi(\theta)\| \leq \epsilon$ .

616 **Assumption 1.**  $\bullet$   $\ell$  is twice differentiable,  $L_\ell$ -Lipschitz, and  $\beta_\ell$ -smooth in  $\theta$ .

617  $\bullet$   $\|\nabla_\theta P_{\hat{y}}\|_2 := \|\nabla_\theta \text{vec}(P_{\hat{y}})\|_2 \leq L_y$  and  $\max_{l \in [m]} \|\nabla_\theta ((P_{\hat{y}})_{l,l})\|_2 \leq \tilde{L}_y$

618  $\bullet$   $\max_{l \in [m]} \|\nabla_{\theta\theta}^2 (P_{\hat{y}})_{l,l}\|_2 \leq \beta_y$ .

619  $\bullet$   $\|\nabla_\theta P_{\hat{y},s}^T\|_2 := \|\nabla_\theta \text{vec}(P_{\hat{y},s}^T)\|_2 \leq L_{ys}$  and  $\max_{l \in [m], j \in [k]} \|\nabla_\theta ((P_{\hat{y},s})_{l,m})\|_2 \leq \tilde{L}_{ys}$

620  $\bullet$   $\max_{l \in [m], j \in [k]} \|\nabla_{\theta\theta}^2 (P_{\hat{y},s})_{l,j}\|_2 \leq \beta_{y,s}$ .

621 **Theorem 10** (Precise statement of Theorem 5). Denote

$$f(\theta, W) = \frac{1}{N} \sum_{i \in [N]} \ell(\mathbf{x}_i, y_i; \theta) + \lambda \left( -\text{Tr}(WP_{\hat{y}}W^T) + 2\text{Tr}(WP_{\hat{y},s}P_s^{-1/2}) - 1 \right).$$

622 Set  $\mathcal{W} := B_F(0, 2D) \subset \mathbb{R}^{k \times m}$  (Frobenius norm ball of radius  $2D$ ),  $D := \frac{\sqrt{mk}}{\hat{p}_{\hat{y}}^{\min} \sqrt{\hat{p}_s^{\min}}}$ . Denote

623  $\Delta_\Phi := \Phi(\theta_0) - \min_\theta \Phi(\theta)$ , where  $\Phi(\theta) := \max_{W \in \mathcal{W}} f(\theta, W)$ . In Algorithm 1, choose the step-  
 624 sizes as  $\eta_\theta = \Theta(1/\kappa^2\beta)$  and  $\eta_W = \Theta(1/\beta)$  and mini-batch size as  $M = \Theta(\max\{1, \kappa\sigma^2\epsilon^{-2}\})$ .  
 625 Then under Assumption 1, the iteration complexity of Algorithm 1 to return an  $\epsilon$ -stationary point of  $f$   
 626 is bounded by

$$\mathcal{O}\left(\frac{\kappa^2\beta\Delta_\Phi + \kappa\beta^2D^2}{\epsilon^2}\right),$$

627 which gives the total stochastic gradient complexity of

$$\mathcal{O}\left(\left(\frac{\kappa^2\beta\Delta_\Phi + \kappa\beta^2D^2}{\epsilon^2}\right)\max\{1, \kappa\sigma^2\epsilon^{-2}\}\right),$$

628 where

$$\begin{aligned}\beta &= \beta_l + 8\lambda D^2\beta_y + 4\lambda\frac{1}{\sqrt{\hat{p}_s^{\min}}}\left(\sqrt{mk}^{3/2}D\beta_{ys}\right) + 2\lambda + 4\lambda\left(DL_y + \frac{L_{ys}}{\sqrt{\hat{p}_s^{\min}}}\right), \\ \mu &= 2\lambda\hat{p}_{\hat{y}}^{\min}, \\ \kappa &= \beta/\mu, \\ \sigma^2 &= 2\left(L_\ell + 2\lambda\tilde{L}_yD^2 + 4\lambda\frac{D}{\sqrt{\hat{p}_s^{\min}}}\sqrt{mk}\tilde{L}_{ys}\right)^2 + 2\left(2\lambda D + 2(\hat{p}_s^{\min})^{-1/2}\sqrt{mk}\right)^2.\end{aligned}$$

629 The theorem follows from Theorem 4.5 in (Lin et al., 2020) combined with the following technical  
630 lemmas. We assume Assumption 1 holds for the remainder of the proof of Theorem 10:

631 **Lemma 5.** *Let*

$$\begin{aligned}f(\boldsymbol{\theta}, W) &= \frac{1}{N}\sum_{i\in[N]}\ell(\mathbf{x}_i, y_i; \boldsymbol{\theta}) + \lambda\left(-\text{Tr}(WP_{\hat{y}}W^T) + 2\text{Tr}(WP_{\hat{y},s}P_s^{-1/2}) - 1\right) \\ &:= \frac{1}{N}\sum_{i\in[N]}g(\boldsymbol{\theta}, W, \mathbf{x}_i, y_i).\end{aligned}$$

632 Then

- 633 1.  $f$  is  $\beta$ -smooth, where  $\beta = \beta_l + 8\lambda D^2\beta_y + 4\lambda\frac{1}{\sqrt{\hat{p}_s^{\min}}}\left(\sqrt{mk}^{3/2}D\beta_{ys}\right) + 2\lambda +$   
634  $4\lambda\left(DL_y + \frac{L_{ys}}{\sqrt{\hat{p}_s^{\min}}}\right).$
- 635 2.  $f(\boldsymbol{\theta}, \cdot)$  is  $2\lambda\hat{p}_{\hat{y}}^{\min}$ -strongly concave for all  $\boldsymbol{\theta}$ .
- 636 3.  $\|W^*\|_F \leq D$ , where  $D$  is as defined in Theorem 10 and  $W^* \in \arg \max_{W \in \mathbb{R}^{k \times m}}$  denotes  
637 any maximizer of  $f(\boldsymbol{\theta}, W)$ .

*Proof.* By Assumption 1,  $g$  is twice continuously differentiable. Hence for part 1, it suffices to upper bound the spectral norm of the second derivative of  $g(\cdot, \cdot, \mathbf{z})$  by  $\beta$  for all  $\mathbf{z} = (\mathbf{x}, y)$ , where we vectorize and then differentiate with respect to  $w := \text{vec } W$  and/or  $\boldsymbol{\theta}$ , so that the resulting first and second derivatives are always vectors or a matrices (not tensors). Notice that  $g(\boldsymbol{\theta}, w, \mathbf{z}) = \ell(\mathbf{z}, \boldsymbol{\theta}) - \lambda w^T(P_{\hat{y}} \otimes \mathbf{I})w + 2\lambda(\text{vec}(W))^T P_{\hat{y},s} P_s^{-1/2} - \lambda$  and

$$\nabla^2 g(\boldsymbol{\theta}, w, \mathbf{z}) = \begin{pmatrix} \nabla_{\boldsymbol{\theta}\boldsymbol{\theta}}^2 g(\boldsymbol{\theta}, w, \mathbf{z}) & \nabla_{\boldsymbol{\theta}w}^2 g(\boldsymbol{\theta}, w, \mathbf{z}) \\ \nabla_{w\boldsymbol{\theta}}^2 g(\boldsymbol{\theta}, w, \mathbf{z}) & \nabla_{ww}^2 g(\boldsymbol{\theta}, w, \mathbf{z}) \end{pmatrix}.$$

Further, by the definition of operator norm, we have

$$\|\nabla^2 g(\boldsymbol{\theta}, w, \mathbf{z})\|_2 \leq \|\nabla_{\boldsymbol{\theta}\boldsymbol{\theta}}^2 g(\boldsymbol{\theta}, w, \mathbf{z})\|_2 + 2\|\nabla_{\boldsymbol{\theta}w}^2 g(\boldsymbol{\theta}, w, \mathbf{z})\|_2 + \|\nabla_{ww}^2 g(\boldsymbol{\theta}, w, \mathbf{z})\|_2.$$

638 Now we vectorize all matrices and then compute derivatives of  $g$  with respect to  $\boldsymbol{\theta}$  and  $\text{vec}(W)$ :

$$\nabla_{\theta} g(\boldsymbol{\theta}, w, \mathbf{z}) = \nabla_{\theta} \ell(\mathbf{z}, \boldsymbol{\theta}) - 2\lambda \nabla_{\theta} \text{vec}(P_{\hat{y}})^T \text{vec}(W^T W) + 2\lambda \nabla_{\theta} \text{vec}(P_{\hat{y},s})^T \text{vec}(W^T P_s^{-1/2}) \quad (31)$$

$$= \nabla_{\theta} \ell(\mathbf{z}, \boldsymbol{\theta}) - 2\lambda \left[ \sum_{l \in [m], i \in [k]} W_{i,l}^2 \nabla_{\theta} ((P_{\hat{y}})_{l,l}) \right] + 2\lambda \left[ \sum_{j \in [m], i \in [k]} W_{i,j} (\nabla_{\theta} (P_{\hat{y}s})_{j,i}) (P_s^{-1/2})_{i,i} \right]; \quad (32)$$

$$\nabla_w g(\boldsymbol{\theta}, w, \mathbf{z}) = -2\lambda W P_{\hat{y}} + 2\lambda P_s^{-1/2} P_{\hat{y},s}^T. \quad (33)$$

639 Differentiating again yields:

$$\begin{aligned} \nabla_{ww}^2 g(\boldsymbol{\theta}, w, \mathbf{z}) &= -2\lambda P_{\hat{y}} \otimes \mathbf{I}_k; \\ \nabla_{w\theta}^2 g(\boldsymbol{\theta}, w, \mathbf{z}) &= \frac{\partial}{\partial \theta} \frac{\partial g(\boldsymbol{\theta}, w, \mathbf{z})}{\partial w} = -2\lambda (\mathbf{I}_m \otimes W) \nabla_{\theta} P_{\hat{y}} + 2\lambda (\mathbf{I}_m \otimes P_s^{-1/2}) \nabla_{\theta} \text{vec}(P_{\hat{y},s}^T); \\ \nabla_{\theta\theta}^2 g(\boldsymbol{\theta}, w, \mathbf{z}) &= \nabla_{\theta}^2 \ell(\mathbf{z}, \boldsymbol{\theta}) - 2\lambda \left[ \sum_{l \in [m], i \in [k]} W_{i,l}^2 \nabla_{\theta\theta}^2 ((P_{\hat{y}})_{l,l}) \right] \\ &\quad + 2\lambda \left[ \sum_{j \in [m], i \in [k]} W_{i,j} (\nabla_{\theta\theta}^2 (P_{\hat{y}s})_{j,i}) (P_s^{-1/2})_{i,i} \right]. \end{aligned}$$

640 Then to establish part 1, use Assumption 1, Clairaut's theorem, the definitions of the matrices  
641 and fact that their entries are in  $[0, 1]$ , the relations  $\|AB\|_2 \leq \|A\|_2 \|B\|_2$  and  $\|\text{vec} W\|_1 \leq$   
642  $\sqrt{mk} \|\text{vec} W\|_2 = \sqrt{mk} \|W\|_F$ , and the fact that  $\|A \otimes B\|_2 = \|A\|_2 \|B\|_2$  to bound the spectral  
643 norm of each second derivative above.

644 The strong concavity statement follows by noticing  $\nabla_{ww}^2 g(\boldsymbol{\theta}, W) \preceq -\mu \mathbf{I}$  iff  $P_{\hat{y}} \succeq \frac{\mu}{2\lambda} \mathbf{I}$  iff  
645  $\min_{i \in [m]} P_{\hat{y}}(i) \geq \frac{\mu}{2\lambda}$ .

646 Part 3 follows from the expression for  $W^*$  in the proof of Theorem 4.  $\square$

647 **Lemma 6.** Consider  $f$  and  $g$  as defined above. Then we have

$$\begin{aligned} \mathbb{E}_{\mathbf{z}} \nabla g(\boldsymbol{\theta}, W, \mathbf{z}) &= \nabla f(\boldsymbol{\theta}, W), \\ \mathbb{E}_{\mathbf{z}} \|\nabla g(\boldsymbol{\theta}, W, \mathbf{z}) - \nabla f(\boldsymbol{\theta}, W)\|_2^2 &\leq 2 \left( L_{\ell} + 2\lambda \tilde{L}_y D^2 + 4\lambda \frac{D}{\sqrt{\hat{p}_s^{\min}}} \sqrt{mk} \tilde{L}_{ys} \right)^2 \\ &\quad + 2 \left( 2\lambda D + 2(\hat{p}_s^{\min})^{-1/2} \sqrt{mk} \right)^2, \end{aligned}$$

648 where both expectations are with respect to the empirical distribution on  $\{\mathbf{z}_i\}_{i \in [N]}$ .



649 *Proof.* The first statement is obvious. The second follows from Eq. (32) in the proof of Lemma 5,  
 650 since

$$\begin{aligned}
 & \mathbb{E}_{\mathbf{z}} \|\nabla g(\boldsymbol{\theta}, W, \mathbf{z}) - \nabla f(\boldsymbol{\theta}, W)\|_2^2 \\
 &= \frac{1}{N} \sum_{i=1}^N \|\nabla g(\boldsymbol{\theta}, W, \mathbf{z}_i)\|_2^2 - \frac{1}{N^2} \sum_{i,j=1}^N \langle \nabla g(\boldsymbol{\theta}, W, \mathbf{z}_i), \nabla g(\boldsymbol{\theta}, W, \mathbf{z}_j) \rangle \\
 &\leq 2 \sup_{\mathbf{z}_i} \|\nabla g(\boldsymbol{\theta}, W, \mathbf{z}_i)\|_2^2 \\
 &\leq 2 \sup_{\mathbf{z}} \{ \|\nabla_{\theta} g(\boldsymbol{\theta}, W, \mathbf{z})\|^2 + \|\nabla_w g(\boldsymbol{\theta}, W, \mathbf{z})\|^2 \} \\
 &\leq 2 \sup_{\mathbf{z}} \left\{ \left\| \nabla_{\theta} \ell(\mathbf{z}, \boldsymbol{\theta}) - 2\lambda \left[ \sum_{l \in [m], i \in [k]} W_{i,l}^2 \nabla_{\theta} ((P_{\hat{y}})_{l,l}) \right] \right. \right. \\
 &\quad \left. \left. + 2\lambda \left[ \sum_{j \in [m], i \in [k]} W_{i,j} (\nabla_{\theta} (P_{\hat{y}s})_{j,i}) (P_s^{-1/2})_{i,i} \right] \right\|_2^2 \right\} \\
 &\quad + 2 \left\| -2\lambda W P_{\hat{y}} + 2\lambda P_s^{-1/2} P_{\hat{y},s}^T \right\|_2^2.
 \end{aligned}$$

651 Then use Assumption 1 and basic norm inequalities to bound the norm of each term.  $\square$

## 652 E Experiment details & additional results

### 653 E.1 Model description

654 For all the experiments, the model’s output is of the form  $O = \text{softmax}(Wx + b)$ . The model outputs  
655 are treated as conditional probabilities  $\mathbf{p}(\hat{y} = i|x) = O_i$  which are then used to estimate the ERMI  
656 regularizer. We encode the true class label  $Y$  and sensitive attribute  $S$  using one-hot encoding. We  
657 define  $\ell(\cdot)$  as the cross-entropy measure between the one-hot encoded class label  $Y$  and the predicted  
658 output vector  $O$ .

659 We use logistic regression as the base classification model for all experiments in Fig. 1. The choice  
660 of logistic regression is due to the fact that all of the existing approaches demonstrated in Fig. 1, use  
661 the same classification model. The model parameters are estimated using the algorithm described in  
662 Algorithm 1. The trade-off curves for FERMI are generated by sweeping across different values for  
663  $\lambda \in [0, 10000]$ . The learning rates  $\eta_\theta, \eta_w$  is constant during the optimization process and is chosen  
664 from the interval  $[0.0005, 0.01]$  for all datasets. Moreover, the number of iterations  $T$  for experiments  
665 in Fig. 1 is fixed to 2000. Since the training and test data for the Adult dataset are separated and  
666 fixed, we do not consider confidence intervals for the test accuracy. We generate ten distinct train/test  
667 sets for each one of the German and COMPAS datasets by randomly sampling 80% of data points as  
668 the training data and the rest 20% as the test data. For a given method in Fig. 1, the corresponding  
669 curve is generated by taking the average test accuracy on 10 training/test datasets. Furthermore,  
670 the confidence intervals are estimated based on the test accuracy’s standard deviation on these 10  
671 datasets.

672 To perform the experiments in Sec. 5.2 we use a linear model with softmax activation. The  
673 model parameters are estimated using the algorithm described in Sec. 5. The data set is cleaned  
674 and processed as described in (Kearns et al., 2018). The trade-off curves for FERMI are generated  
675 by sweeping across different values for  $\lambda$  in  $[0, 100]$  interval, learning rate  $\eta$  in  $[0.0005, 0.01]$ , and  
676 number of iterations  $T$  in  $[50, 200]$ . The data set is cleaned and processed as described in (Kearns  
677 et al., 2018).

678 For the experiments in Sec. 5.3, we create the synthetic color MNIST as described by Li & Vascon-  
679 celos (2019). We set the value  $\sigma = 0$ . In Fig. 3, we compare the performance of stochastic solver  
680 (Algorithm 1) against the baselines. We use a mini-batch of size 512 when using the stochastic solver.  
681 The color MNIST data has 60000 training samples, so using the stochastic solver gives a speedup  
682 of around 100x for each iteration, and an overall speedup of around 40x. We present our results on  
683 two neural network architectures; namely, LeNet-5 (Lecun et al., 1998) and a Multi-layer perceptron  
684 (MLP). We set the MLP with two hidden layers (with 300 and 100 nodes) and an output layer with  
685 ten nodes. A ReLU activation follows each hidden layer, and a softmax activation follows the output  
686 layer.

687 Some general advice for tuning  $\lambda$ : Larger value for  $\lambda$  generally translates to better fairness, but one  
688 must be careful to not use a very large value for  $\lambda$  as it could lead to poor generalization performance  
689 of the model. The optimal values for  $\lambda$ ,  $\eta$ , and  $T$  largely depend on the data and intended application.  
690 We recommend starting with  $\lambda \approx 10$ . In Appendix E.4, we can observe the effect of changing  $\lambda$  on  
691 the model accuracy and fairness for the COMPAS dataset.

### 692 E.2 More comparison to (Mary et al., 2019)

693 The algorithm proposed by Mary et al. (2019) backpropagates the batch estimate of ERMI, which is  
694 biased especially for small minibatches. Our work uses a correct and unbiased implementation of a  
695 stochastic ERMI estimator; Furthermore, they do not establish any convergence guarantees, and in  
696 fact their algorithm does not converge. See Fig. 4 for the evolution of *training loss* and *test accuracy*  
697 on setup of Table 1 in (Mary et al., 2019).

### 698 E.3 Performance in the presence of outliers & class-imbalance

699 We also performed an additional experiment on Adult (setup of Fig 1) with a random 10% of sensitive  
700 attributes in *training* forced to 0. FERMI offers the most favorable tradeoffs on *clean test* data,  
701 however, all methods reach a higher plateau (see Fig 5). The interplay between fairness, robustness,  
702 and generalization is an important future direction. With respect to imbalanced sensitive groups, the

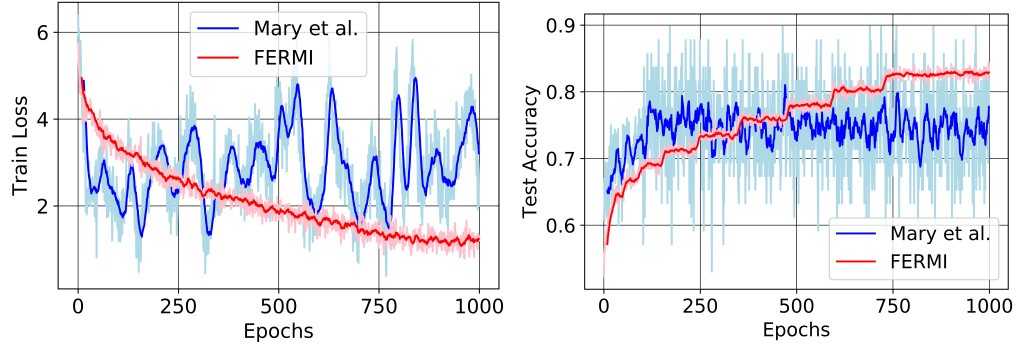

Figure 4: (Mary et al., 2019) fails to converge to a stationary point whereas our stochastic estimator easily converges

703 experiments in Fig 2 are on a naturally imbalanced dataset, where  $\max_{s \in S} p(s) / \min_{s \in S} p(s) > 100$  for  
 704 3-18 sensitive attrib, and FERMI offers the favorable tradeoffs.

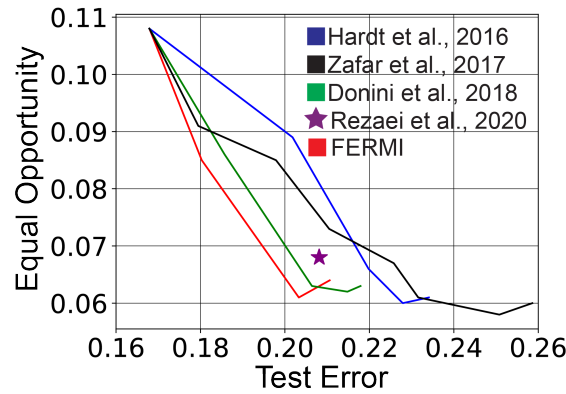

Figure 5: Comparing FERMI with other methods in the presence of outliers (random 10% of sensitive attributes in *training* forced to 0. FERMI achieves better trade-off.

705 **E.4 Effect of hyperparameter  $\lambda$  on the accuracy-fairness tradeoffs**

706 We run ERMI algorithm for the binary case to COMPAS dataset to investigate the effect of hyper-  
 707 parameter tuning on the accuracy-fairness trade-off of the algorithm. As it can be observed in Fig. 6,  
 708 by increasing  $\lambda$  from 0 to 1000, test error (left axis, red curves) is slightly increased. On the other  
 709 hand, the fairness violation (right axis, green curves) is decreased as we increase  $\lambda$  to 1000. Moreover,  
 710 for both notions of fairness (demographic parity with the solid curves and equality of opportunity  
 711 with the dashed curves) the trade-off between test error and fairness follows the similar pattern. To  
 712 measure the fairness violation, we use demographic parity violation and equality of opportunity  
 713 violation defined in Section equation 5 for the solid and dashed curves respectively.

714 **E.5 Complete version of Figure 1 (with pre-processing and post-processing baselines)**

715 In Figure 1 we compared FERMI with several state-of-the-art in-processing approaches. In the  
 716 next three following figures we compare the in-processing approaches depicted in Figure 1 with  
 717 pre-processing and post-processing methods including (Hardt et al., 2016; Kamiran et al., 2010;  
 718 Feldman et al., 2015).

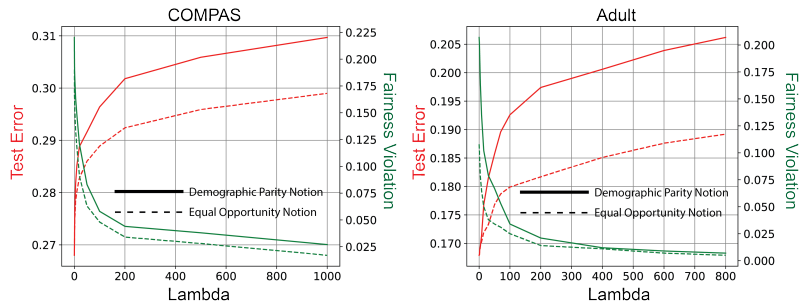

Figure 6: Tradeoff of fairness violation vs test error for FERMI algorithm on COMPAS and Adult datasets. The solid and dashed curves correspond to FERMI algorithm under the demographic parity and equality of opportunity notions accordingly. The left axis demonstrates the effect of changing  $\lambda$  on the test error (red curves), while the right axis shows how the fairness of the model (measured by equality of opportunity or demographic parity violations) depends on changing  $\lambda$ .

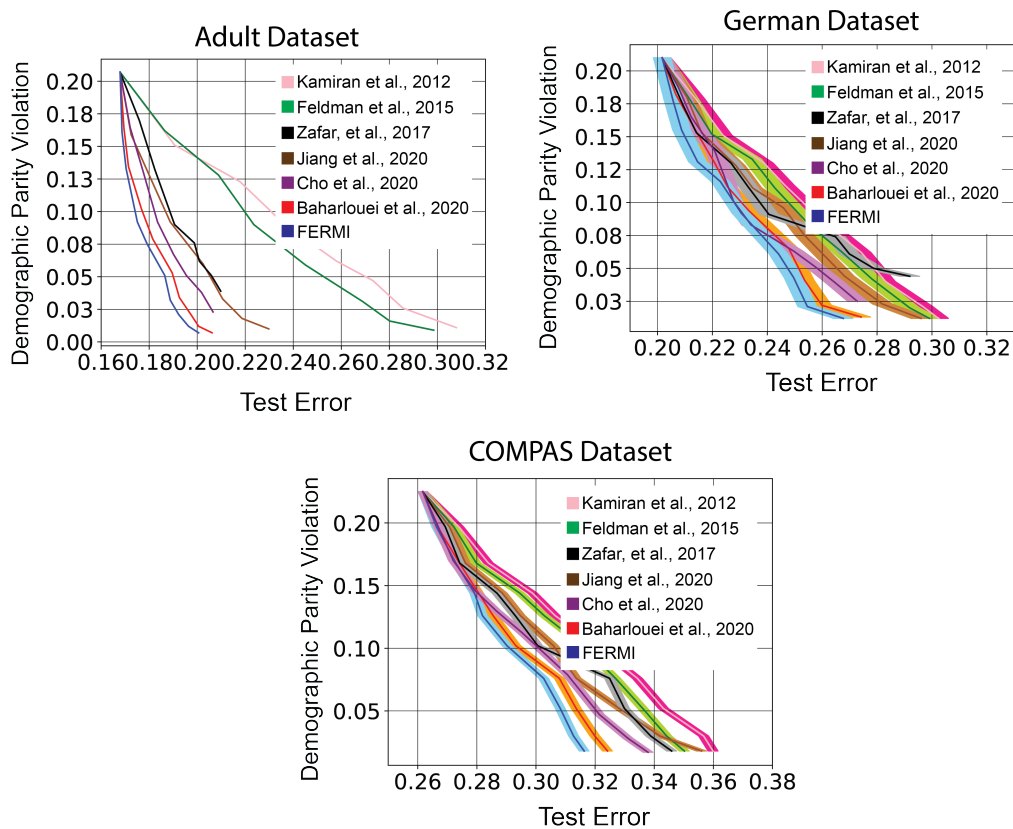

Figure 7: Tradeoff of demographic parity violation vs test error for FERMI algorithm on COMPAS, German, and Adult datasets.

719 **E.6 Description of datasets**

720 All of the following datasets are publicly available at UCI repository.

721 **German Credit Dataset.**<sup>3</sup> German Credit dataset consists of 20 features (13 categorical and 7  
 722 numerical) regarding to social, and economic status of 1000 customers. The assigned task is to  
 723 classify customers as good or bad credit risks. Without imposing fairness, the DP violation of the

<sup>3</sup>[https://archive.ics.uci.edu/ml/datasets/statlog+\(german+credit+data\)](https://archive.ics.uci.edu/ml/datasets/statlog+(german+credit+data))

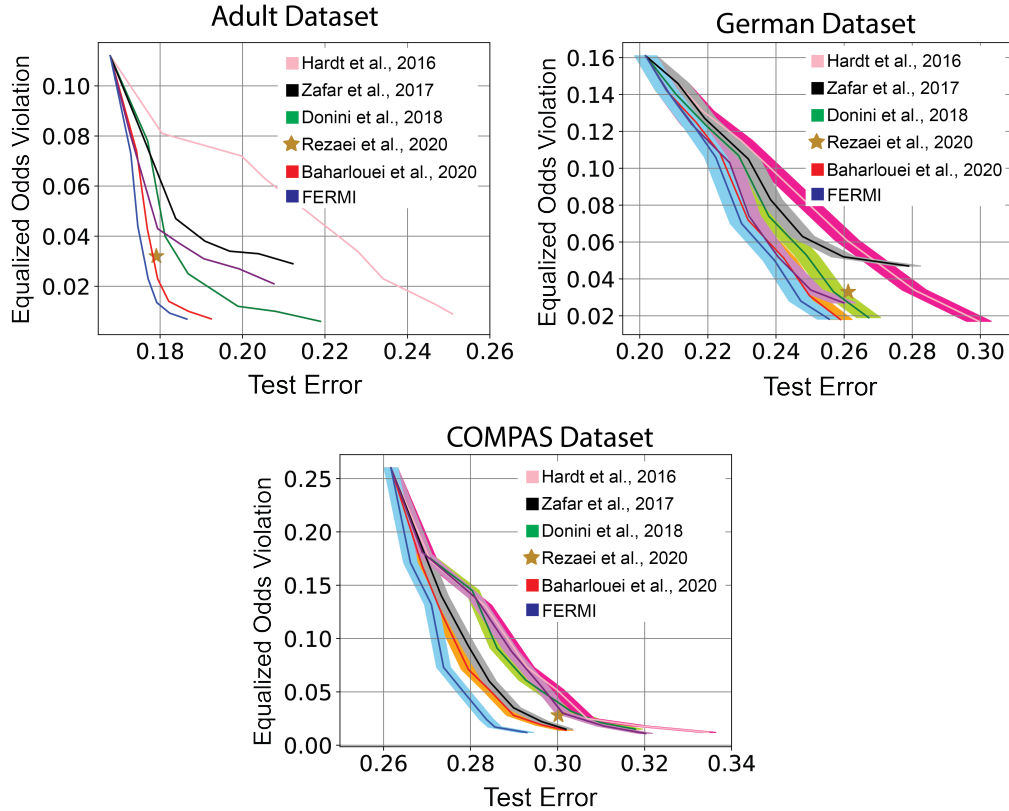

Figure 8: Tradeoff of equalized odds violation vs test error for FERMI algorithm on COMPAS, German, and Adult datasets.

724 trained model is larger than 20%. We choose 80% of customers as the train data and the remaining  
 725 20% customers as the test data. The sensitive attributes are gender, and marital-status.

726 **Adult Dataset.**<sup>4</sup> Adult dataset contains the census information of individuals including education,  
 727 gender, and capital gain. The assigned classification task is to predict whether a person earns over  
 728 50k annually. The train and test sets are two separated files consisting of 32, 000 and 16, 000 samples  
 729 respectively. We consider gender and race as the sensitive attributes (For the experiments involving  
 730 one sensitive attribute, we have chosen gender). Learning a logistic regression model on the training  
 731 dataset (without imposing fairness) shows that only 3 features out of 14 have larger weights than  
 732 the gender attribute. Note that removing the sensitive attribute (gender), and retraining the model  
 733 does not eliminate the bias of the classifier. the optimal logistic regression classifier in this case is  
 734 still highly biased. For the clustering task, we have chosen 5 continuous features (Capital-gain, age,  
 735 fnlwgt, capital-loss, hours-per-week), and 10, 000 samples to cluster. The sensitive attribute of each  
 736 individual is gender.

737 **Communities and Crime Dataset.**<sup>5</sup> The dataset is cleaned and processed as described in (Kearns  
 738 et al., 2018). Briefly, each record in this dataset summarizes aggregate socioeconomic information  
 739 about both the citizens and police force in a particular U.S. community, and the problem is to predict  
 740 whether the community has a high rate of violent crime.

741 **COMPAS Dataset.**<sup>6</sup> Correctional Offender Management Profiling for Alternative Sanctions (COM-  
 742 PAS) is a famous algorithm which is widely used by judges for the estimation of likelihood of  
 743 reoffending crimes. It is observed that the algorithm is highly biased against the black defendants.

<sup>4</sup><https://archive.ics.uci.edu/ml/datasets/adult>.

<sup>5</sup><http://archive.ics.uci.edu/ml/datasets/communities+and+crime>

<sup>6</sup><https://www.kaggle.com/danofer/compass>

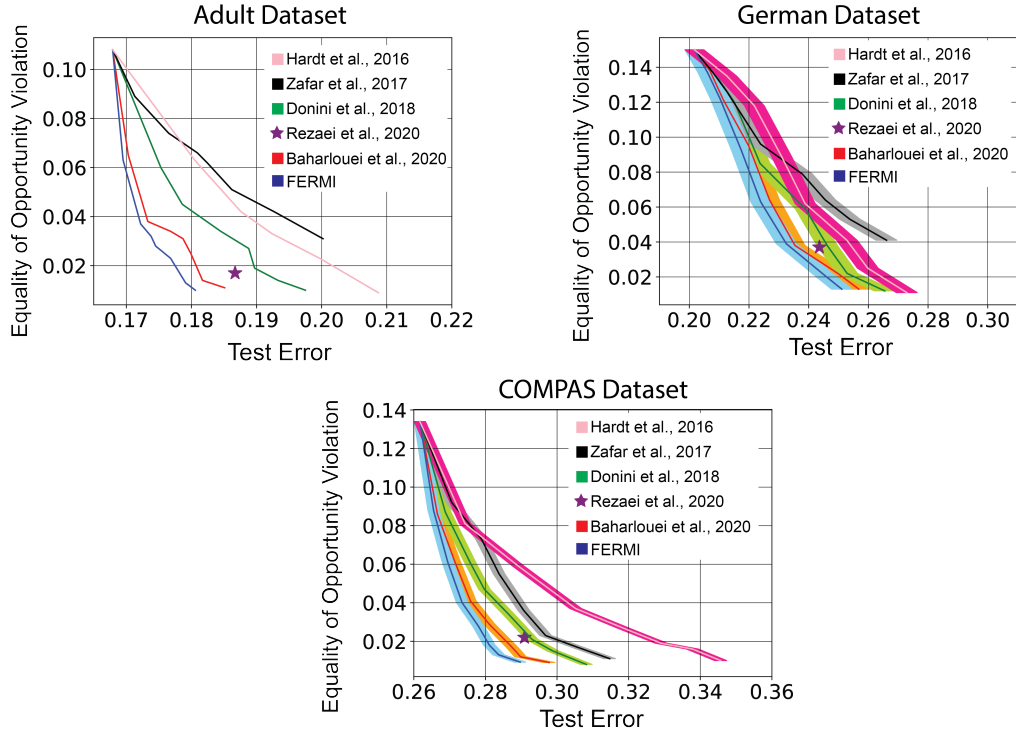

Figure 9: Tradeoff of equality of opportunity violation vs test error for FERMI algorithm on COMPAS, German, and Adult datasets.

744 The dataset contains features used by COMPAS algorithm alongside with the assigned score by the  
 745 algorithm within two years of the decision.

746 **Colored MNIST Dataset.**<sup>7</sup> We use the code by Li & Vasconcelos (2019) to create a Colored MNIST  
 747 dataset with  $\sigma = 0$ . We use the provided LeNet-5 model trained on the colored dataset for all baseline  
 748 models of Baharlouei et al. (2020); Mary et al. (2019); Cho et al. (2020b) and FERMI, where we  
 749 further apply the corresponding regularizer in the training process.

<sup>7</sup><https://github.com/JerryYLi/Dataset-REPAIR/>

750 **F Anonymized code for experiments**

751 The anonymized code for all of the experiments in this paper is available on Dropbox:  
752 <https://www.dropbox.com/sh/516cm8olq0idpsd/AADD0LOcPWpx4AAhzsEkFTOca?dl=0>
